# Supplementary material for: A new lineage of non-photosynthetic green algae with extreme organellar genomes
Source: bioRxiv or medRxiv preprint supplement (doi:10.1101/2021.11.17.468966), 2022-02-23
Supplement: Supplementary file [file media-1.pdf]

**Supplementary material to the paper:**

**A new lineage of non-photosynthetic green algae with extreme organellar genomes**

Tomáš Pánek<sup>1,2</sup>, Dovilė Barcytė<sup>1</sup>, Sebastian C. Treitli<sup>3</sup>, Kristína Záhonová<sup>1</sup>, Martin Sokol<sup>1</sup>, Tereza Ševčíková<sup>1</sup>, Eliška Zadrobílková<sup>2</sup>, Karin Jaške<sup>1</sup>, Naoji Yubuki<sup>2</sup>, Ivan Čepička<sup>2</sup>, Marek Eliáš<sup>1,\*</sup>

<sup>1</sup>Department of Biology and Ecology, Faculty of Science, University of Ostrava, 701 00 Ostrava, Czech Republic

<sup>2</sup>Department of Zoology, Faculty of Science, Charles University, 128 43 Prague, Czech Republic

<sup>3</sup>Department of Parasitology, Faculty of Science, Charles University, BIOCEV, 252 42 Vestec, Czech Republic

Correspondence: [marek.elias@osu.cz](mailto:marek.elias@osu.cz)

**This file contains supplementary Figs S1 to S8.**

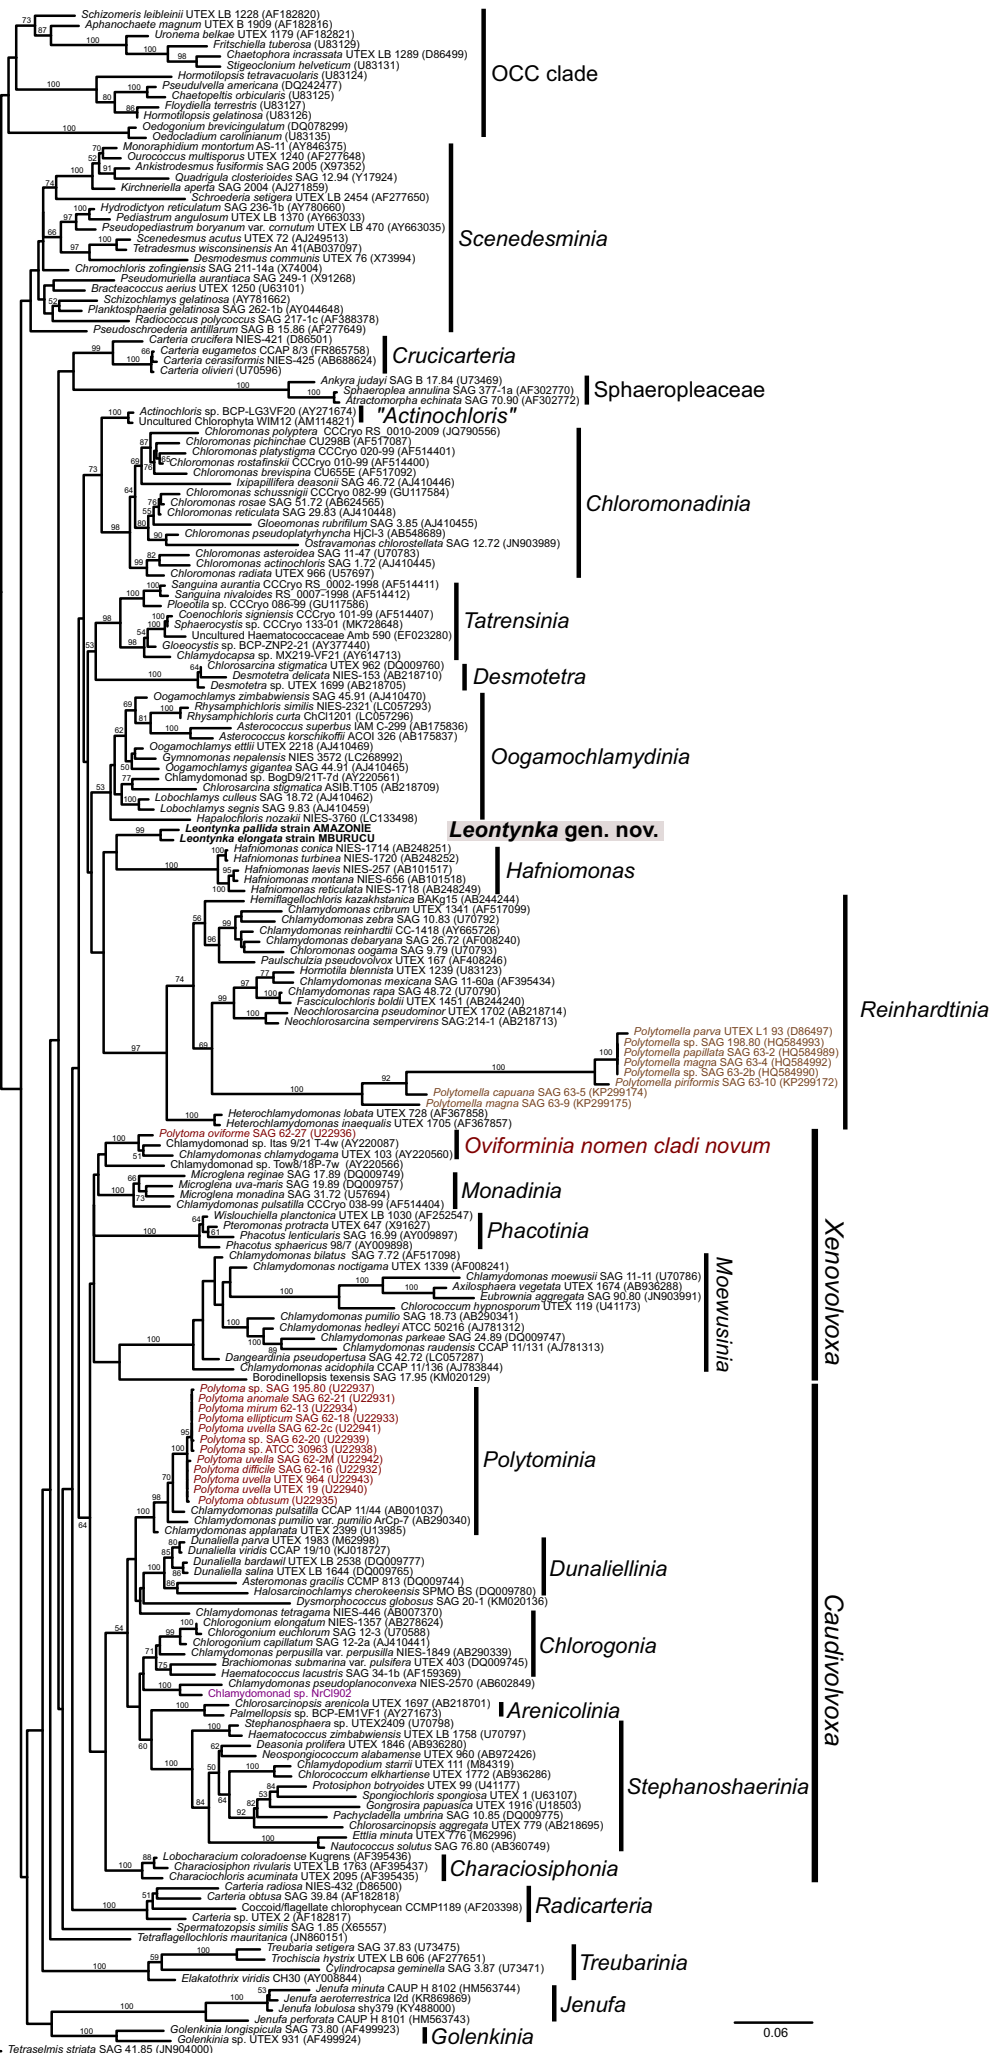

**Fig. S1** Maximum likelihood phylogenetic tree (IQ-TREE, TIM2+F+I+G4 substitution model) of 18S rRNA gene sequences from Chlorophyceae. The chlorodendrophycean *Tetraselmis striata* is used as an outgroup. Bootstrap support values are shown when  $\geq 50$ . Previously demarcated main clades (Nakada et al., 2008) are annotated in the tree together with the newly designated clade "*Oviforminia*". Sequences from non-photosynthetic taxa are in colour. The new genus *Leontynka* (highlighted) forms a novel clade without apparent specific affinities to other particular lineages of Chlamydomonadales. The clade "*Actinochloris*" is labelled provisionally, as the bona fide *Actinochloris* genus belongs elsewhere.

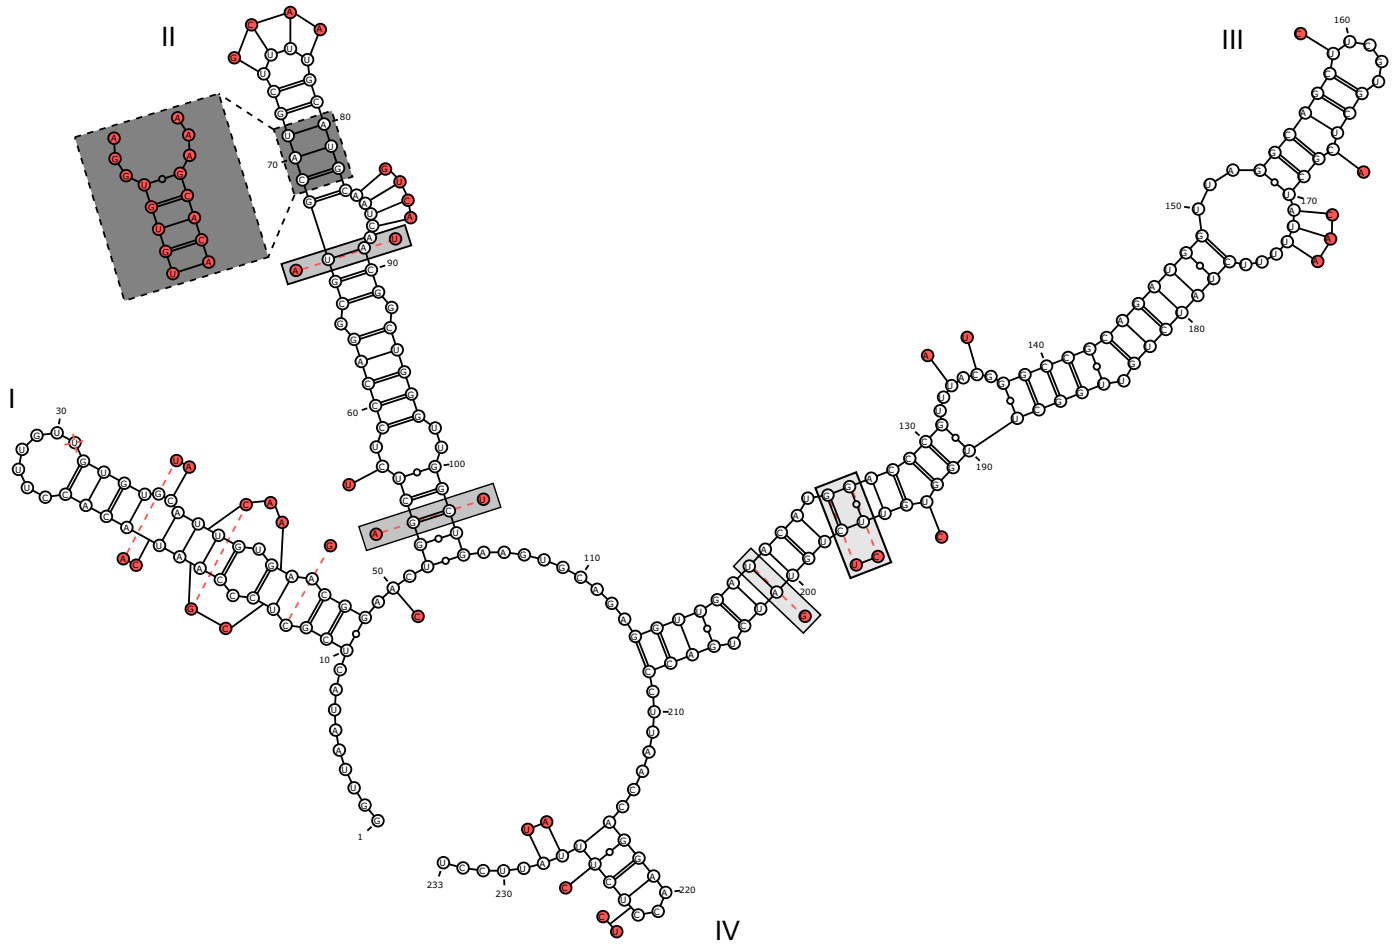

**Fig. S2** Predicted secondary structure of the ITS2 region of *Leontynka pallida*, with differences in the corresponding region of *Leontynka elongata* mapped onto it. Classical compensatory base changes in the helix II are highlighted by a light grey background, a region more substantially differing between the two species is highlighted by a dark grey background.

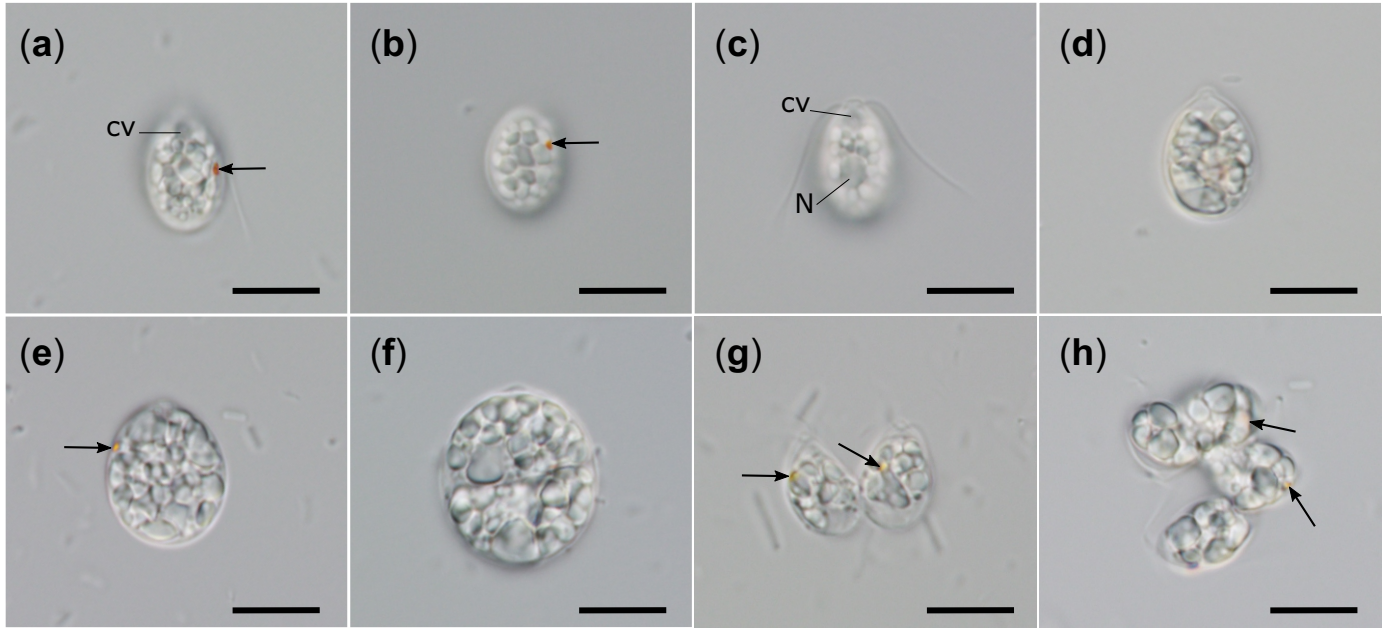

**Fig. S3** *Leontynka pallida* under the light microscope. Scale bars = 10 µm.  
 Abbreviations: arrows – eyespot; cv – contractile vacuole; N – nucleus.

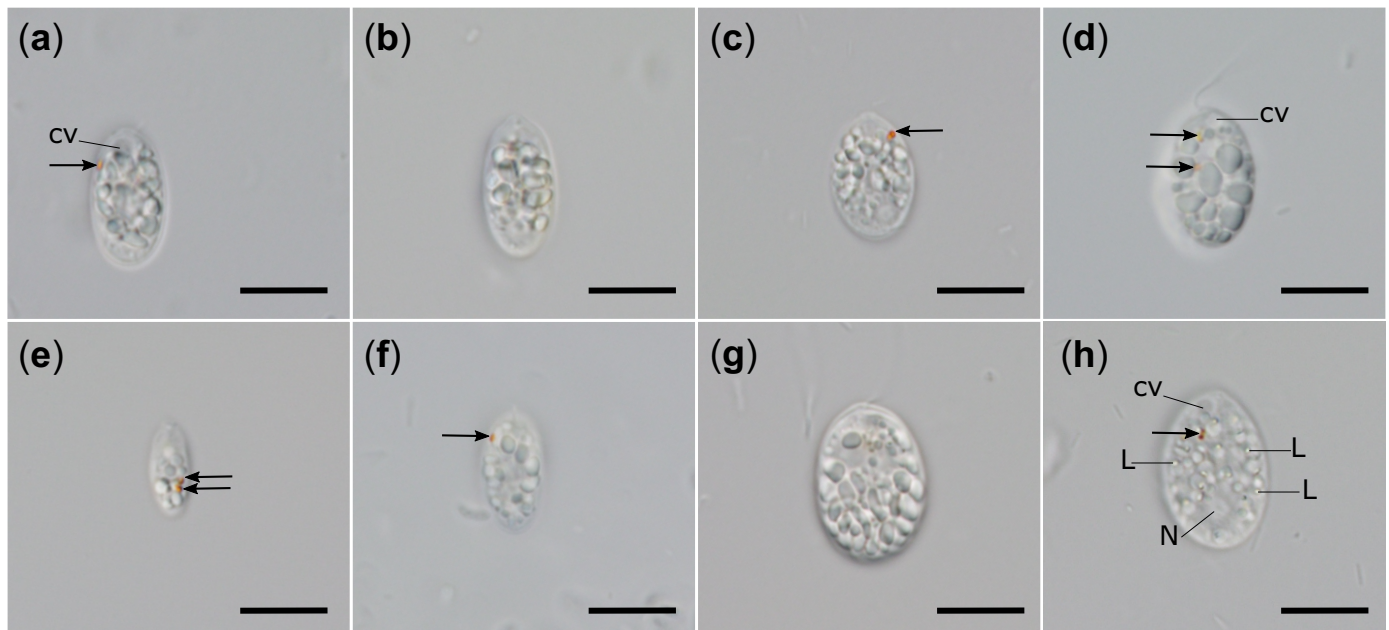

**Fig. S4** *Leontynka elongata* under the light microscope. Scale bars = 10 µm.  
 Abbreviations: arrows – eyespot; cv – contractile vacuole; L – lipid droplet; N – nucleus.

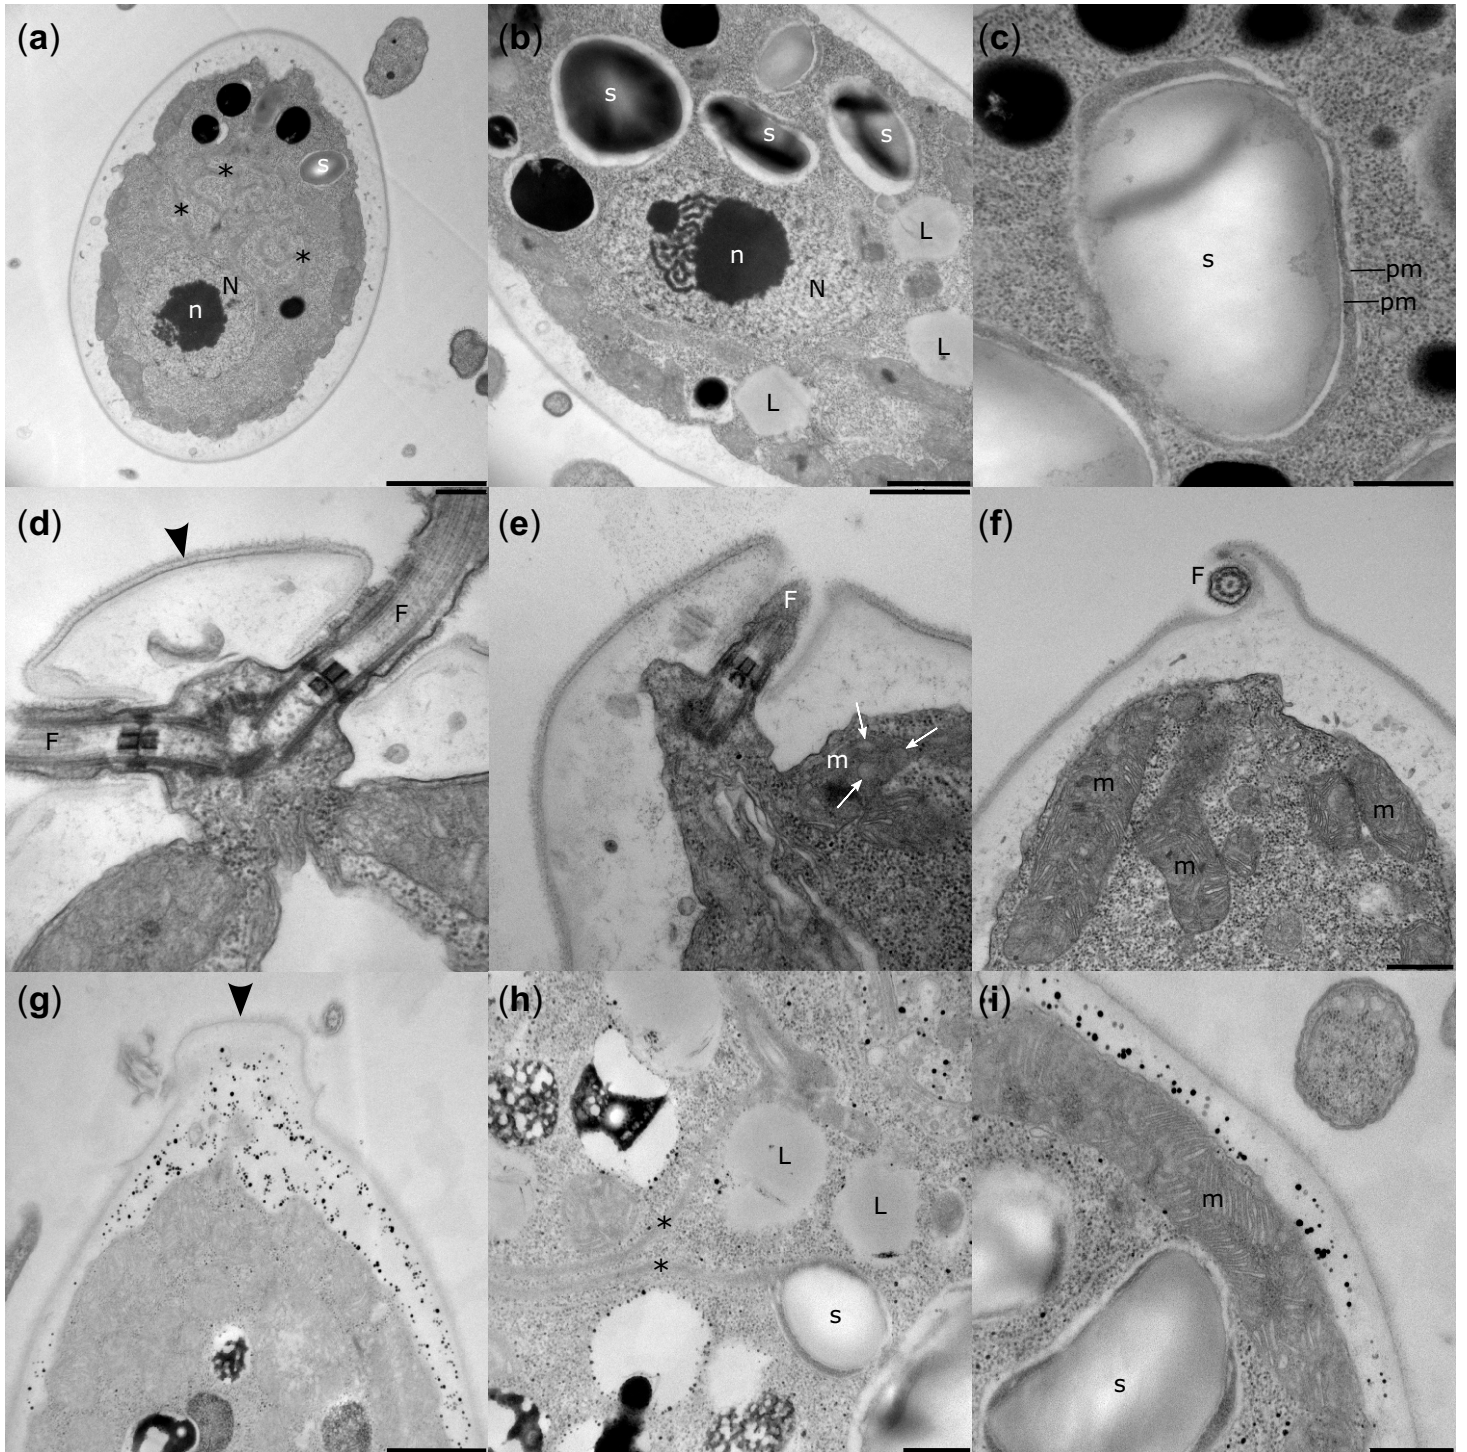

**Fig. S5** Ultrastructure of *Leontynka elongata* (a–f) and *Leontynka pallida* (g–i). (a) Cell with a slightly posterior nucleus and highly convoluted leucoplast. (b) Cell with a central nucleus and multiple starch blocks. (c) Two membranes surround the plastid. (d) Prominent keel-shaped papilla and two flagella. (e) Cross section through mitochondria with discoidal cristae (white arrowheads). (f) Longitudinal section through mitochondria with discoidal cristae. (g) Ovoid cell with a keel-shaped papilla. (h) Presence of lipid droplets in an older cell. (i) Mitochondria containing putative tubulo-vesicular cristae (longitudinal section through the organelle). Abbreviations: L – lipid droplet; N – nucleus; n – nucleolus; s – starch; m – mitochondrion; F – flagellum, v – vacuole. Black arrowheads indicate papillae; asterisks mark “bridges” jointing plastid’s compartments. Scale bars: a = 2  $\mu\text{m}$ ; b, g = 1  $\mu\text{m}$ ; c, f, h, i = 0.5  $\mu\text{m}$ ; d, e = 0.2  $\mu\text{m}$ .

# Phyre2

Date Fri Nov 13 17:28:33 GMT 2020

Confidence Key  
 High(9) ██████████ Low (0)  
 ? Disordered ( 30%)  
 α Alpha helix ( 54%)  
 β Beta strand ( 11%)  
 T M helix ( 2%)

Secondary structure and disorder prediction  
 FtsH - *Leontynka pallida*

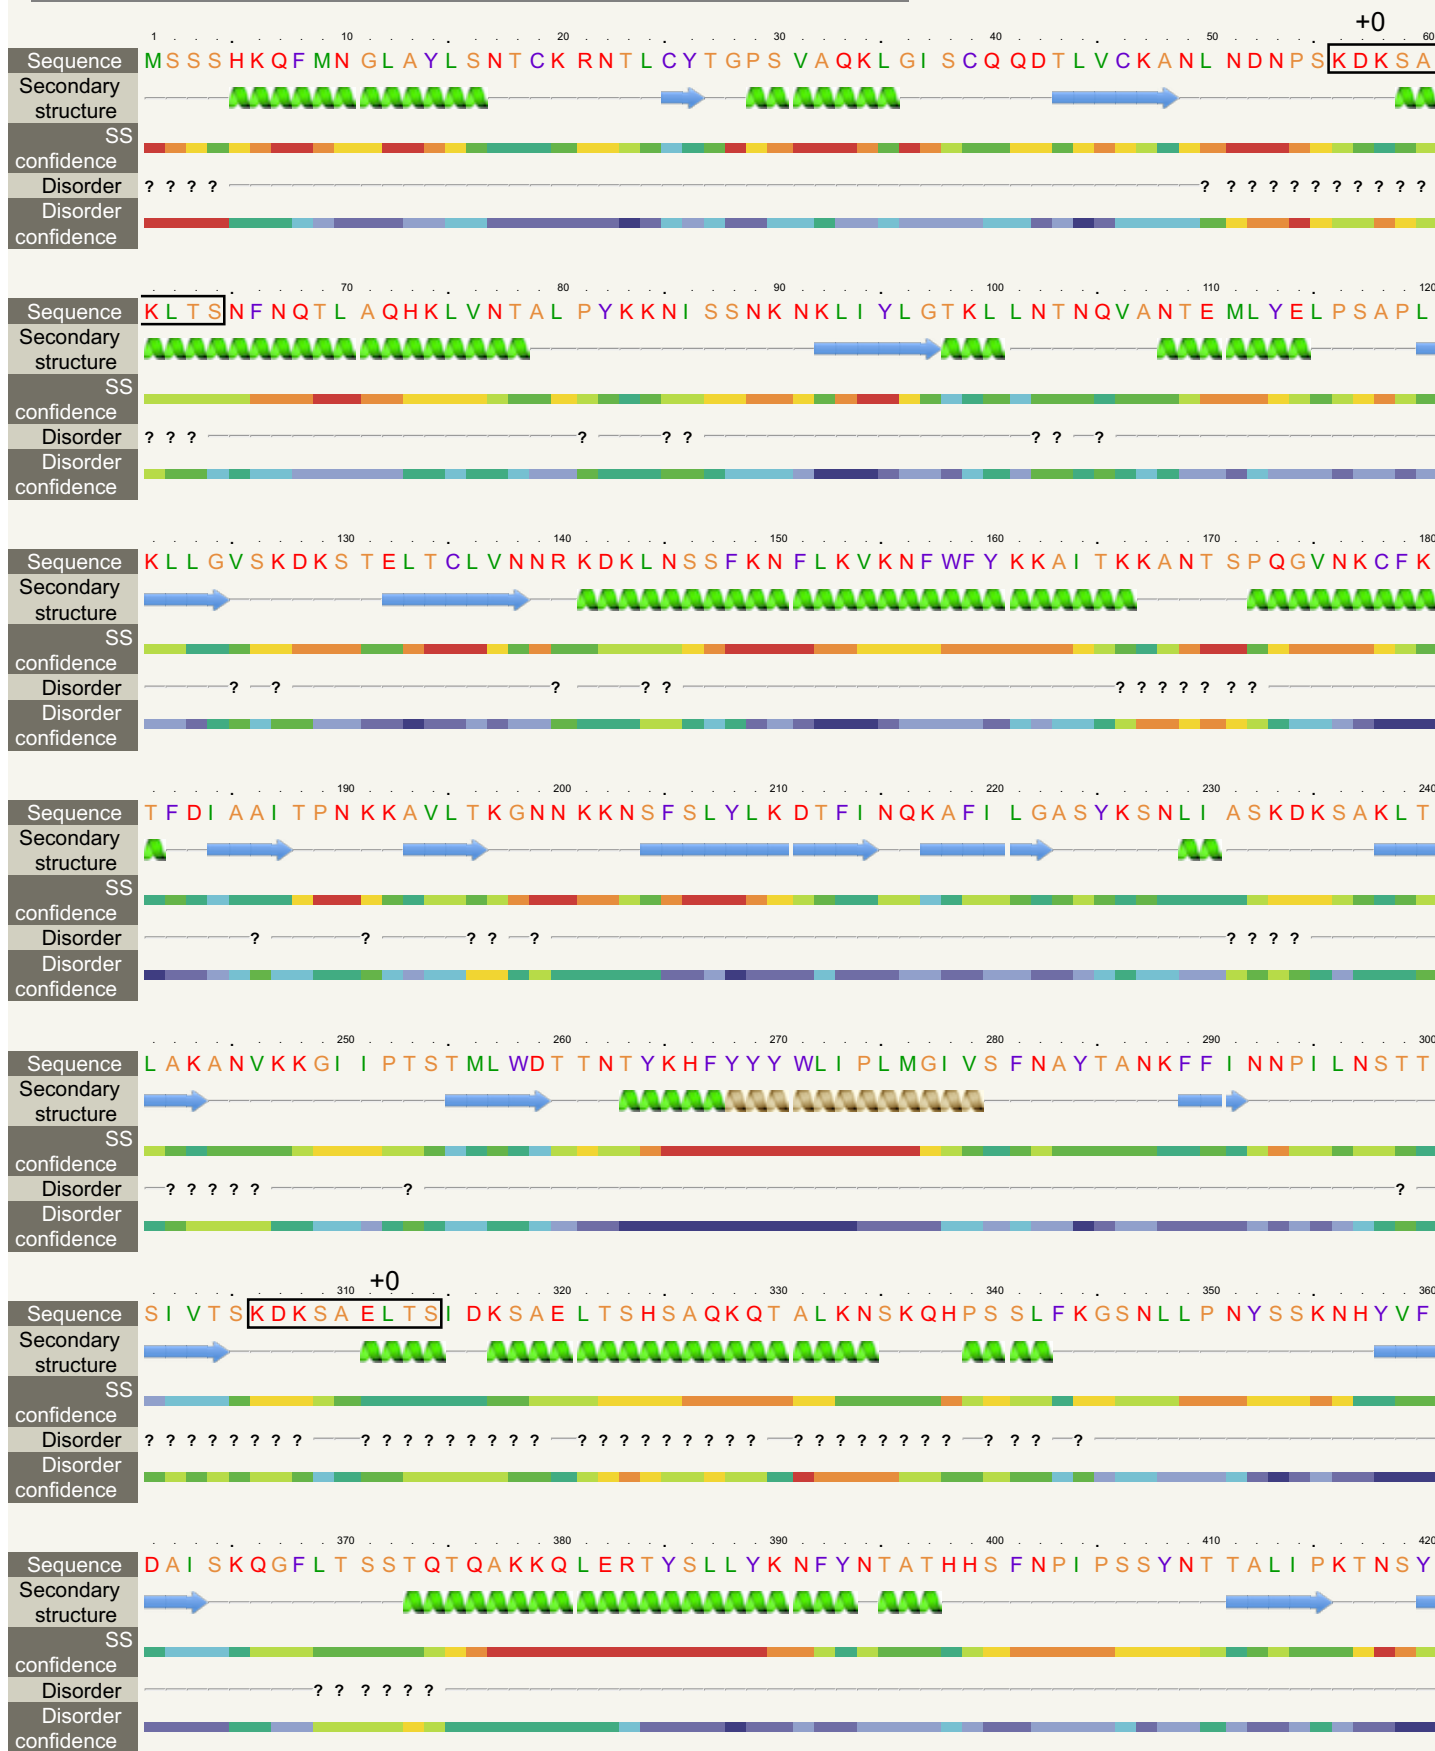

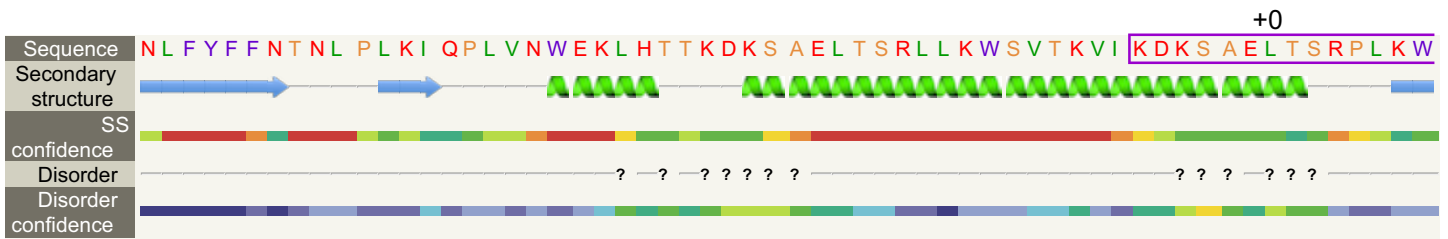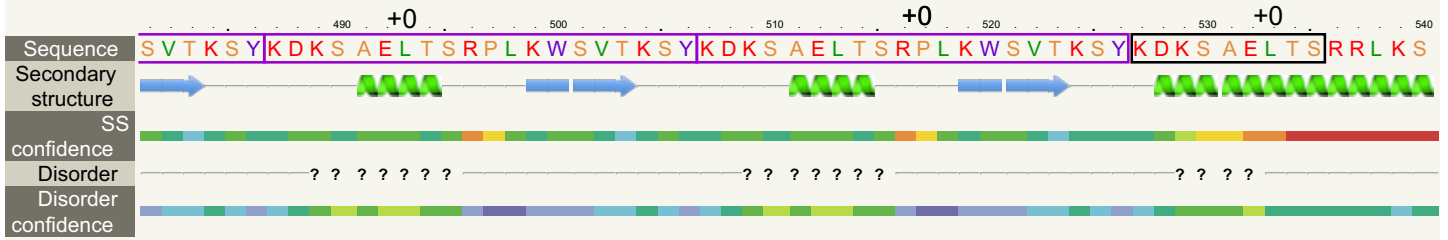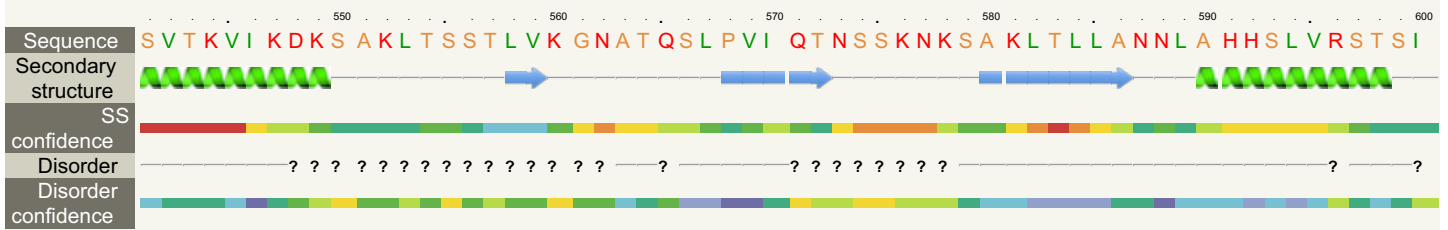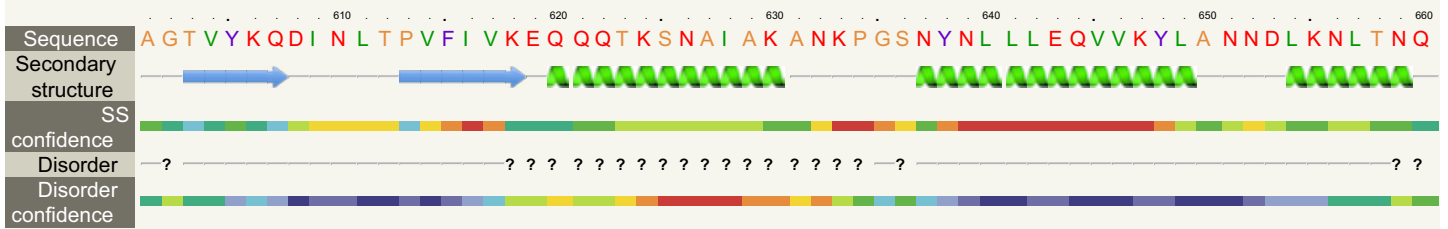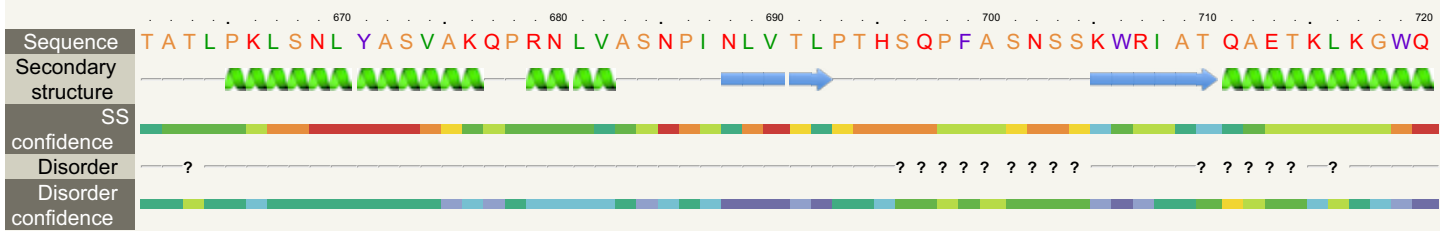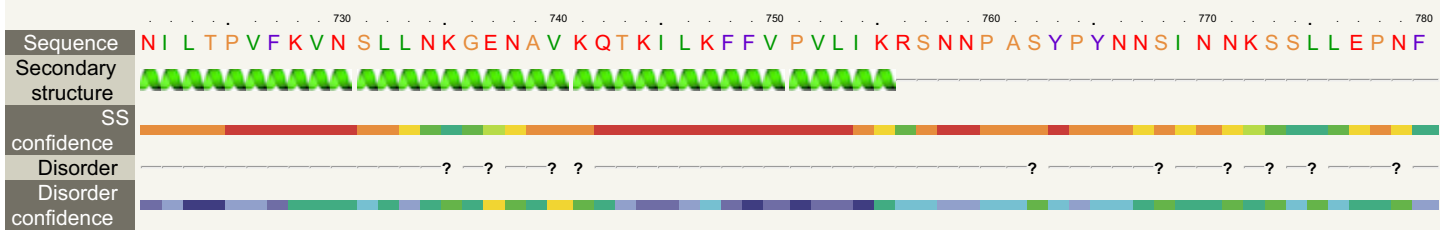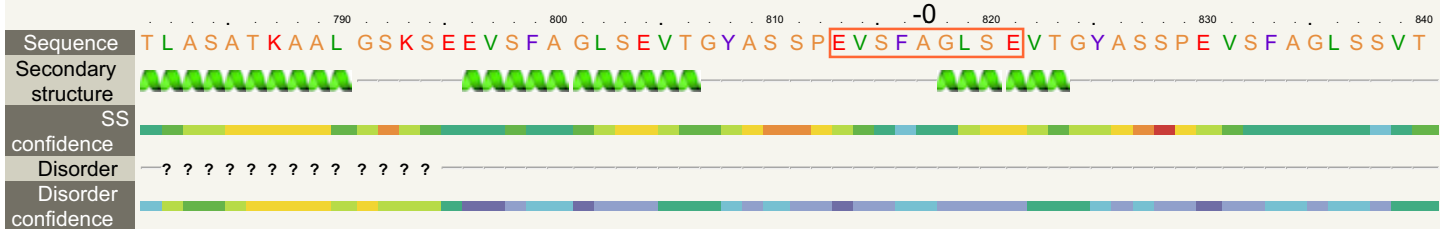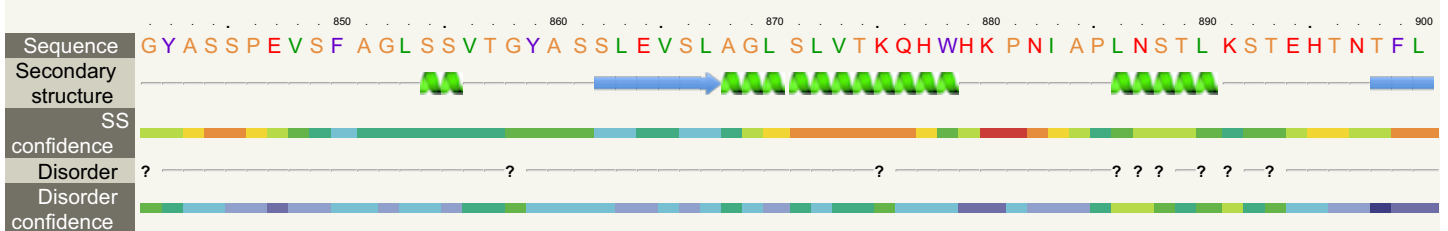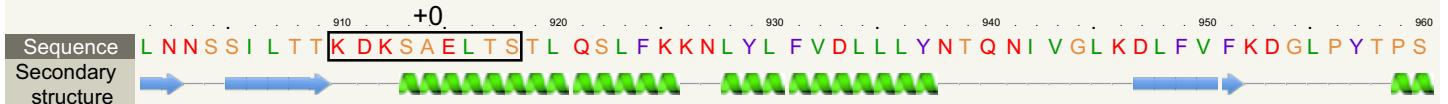

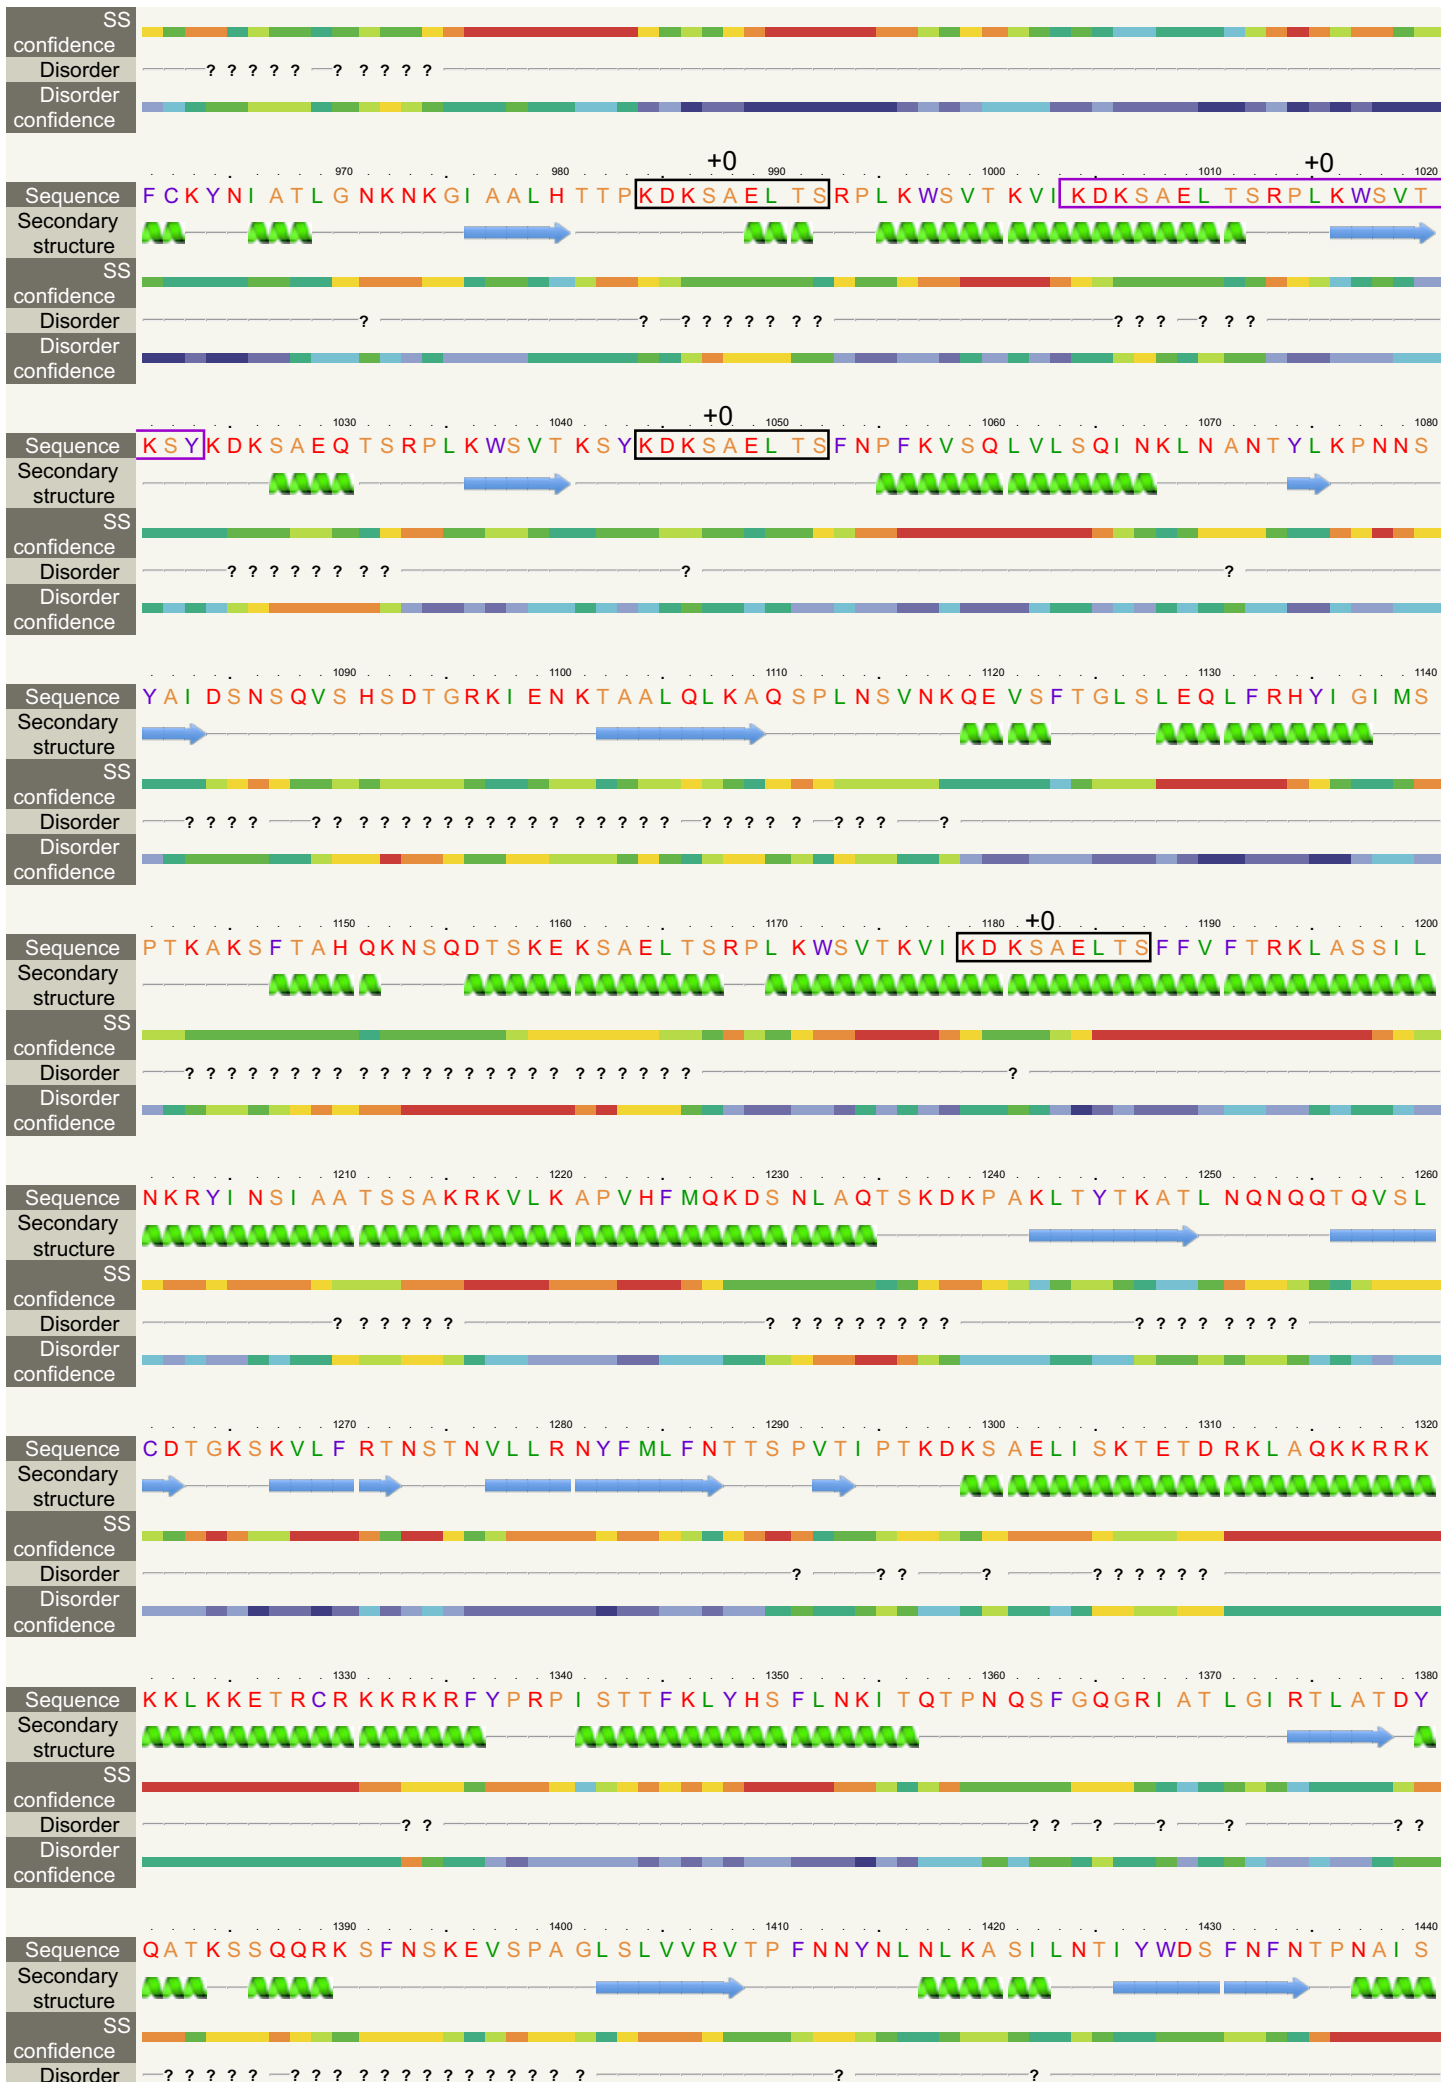



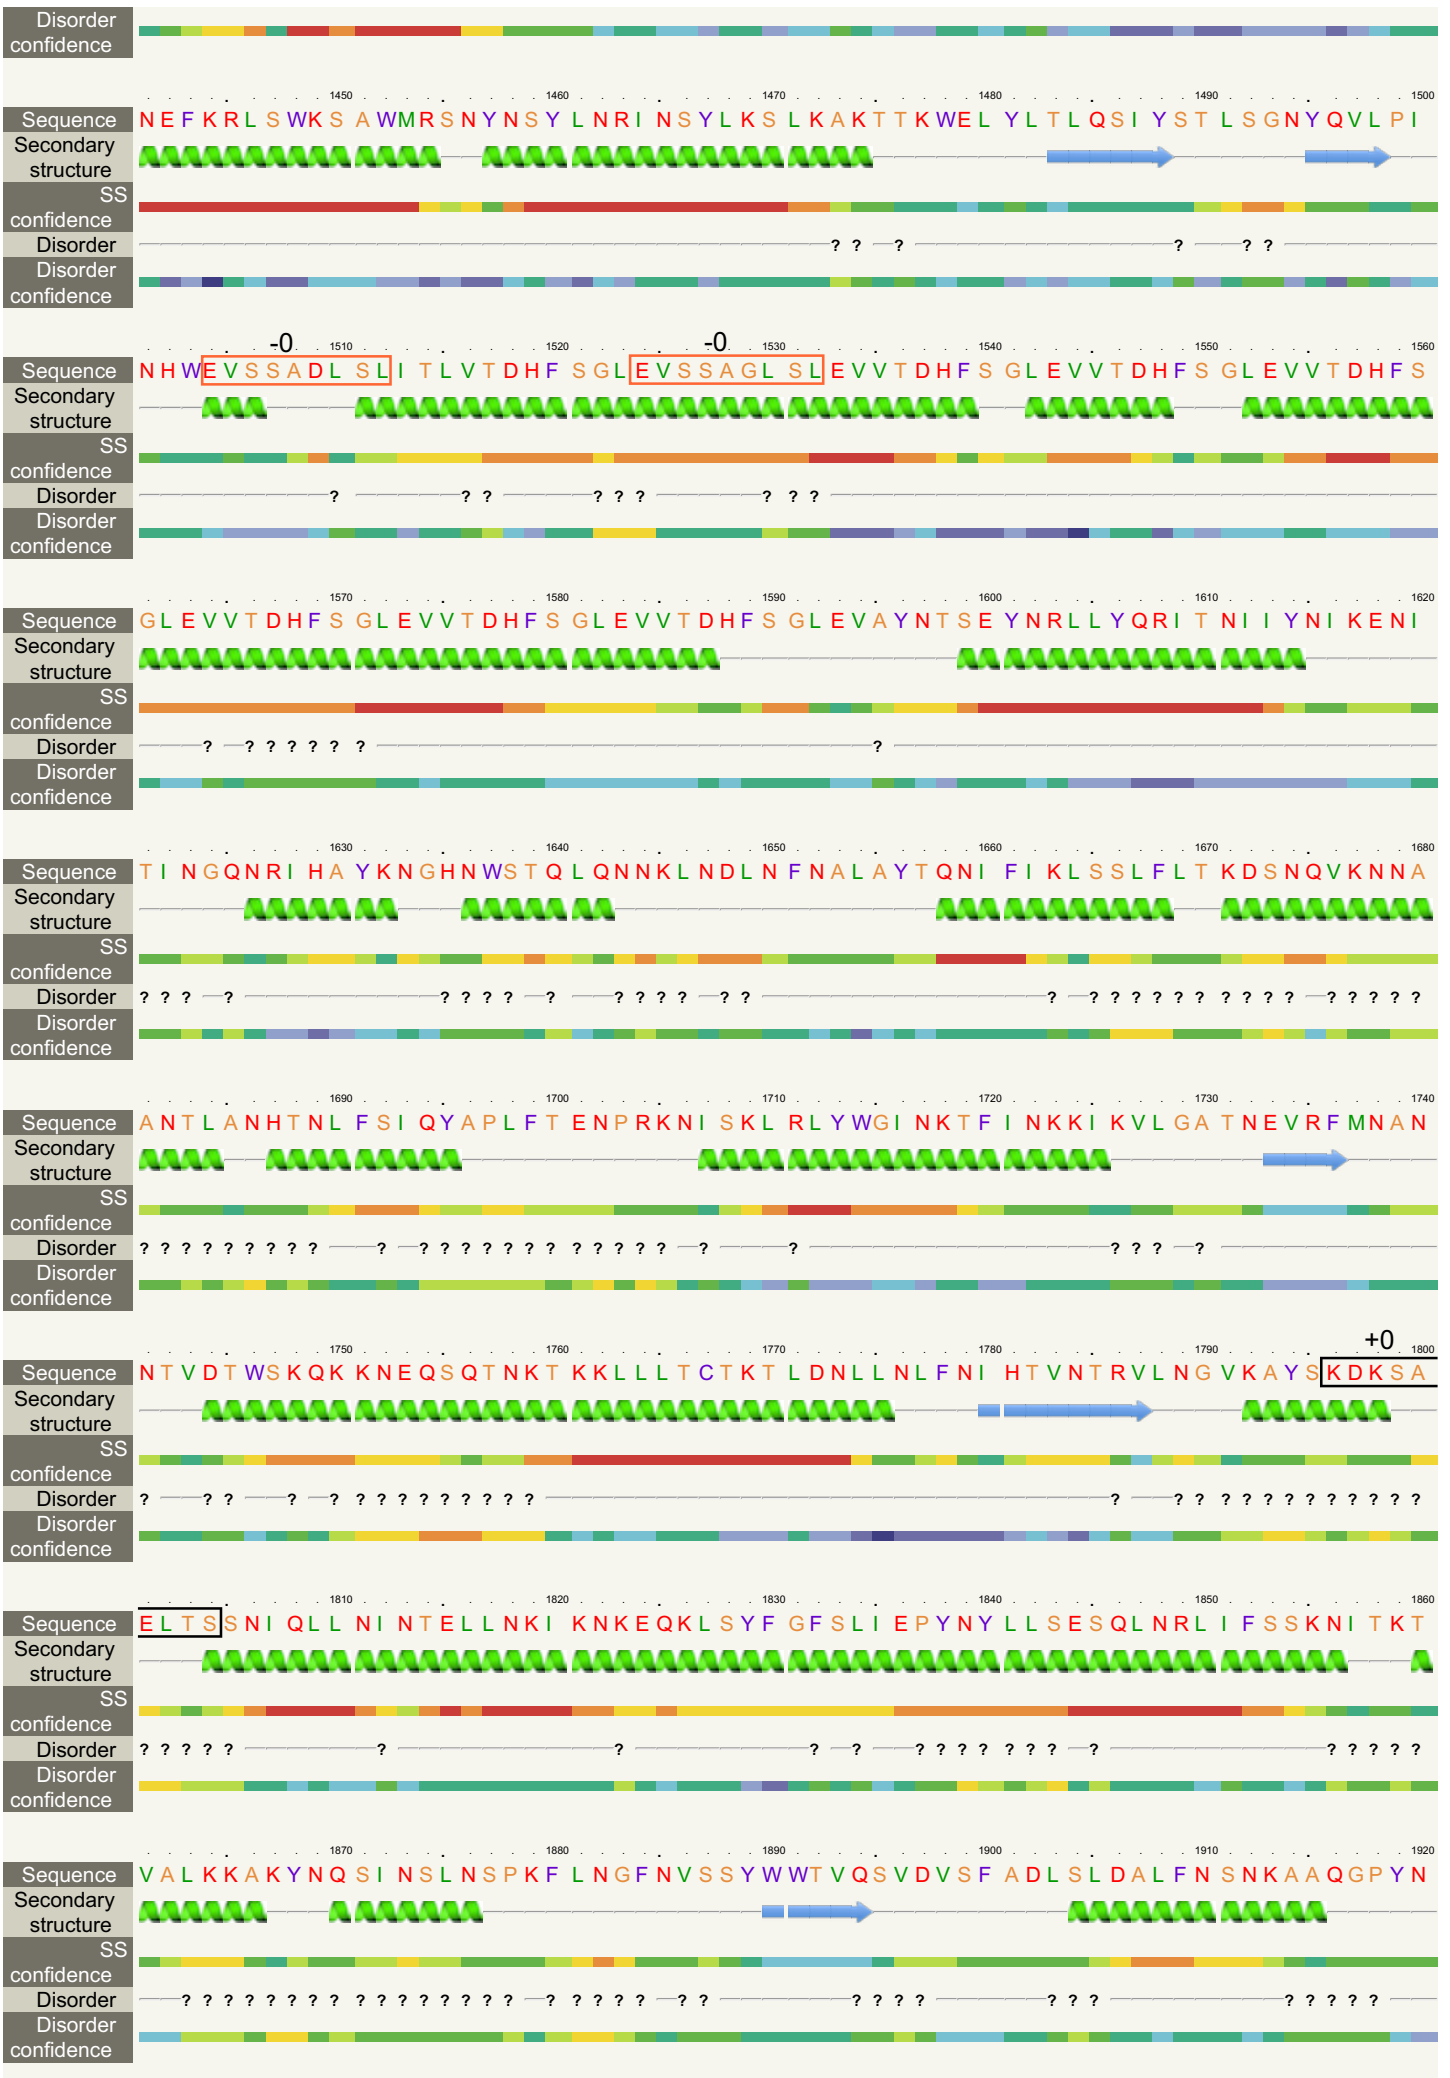

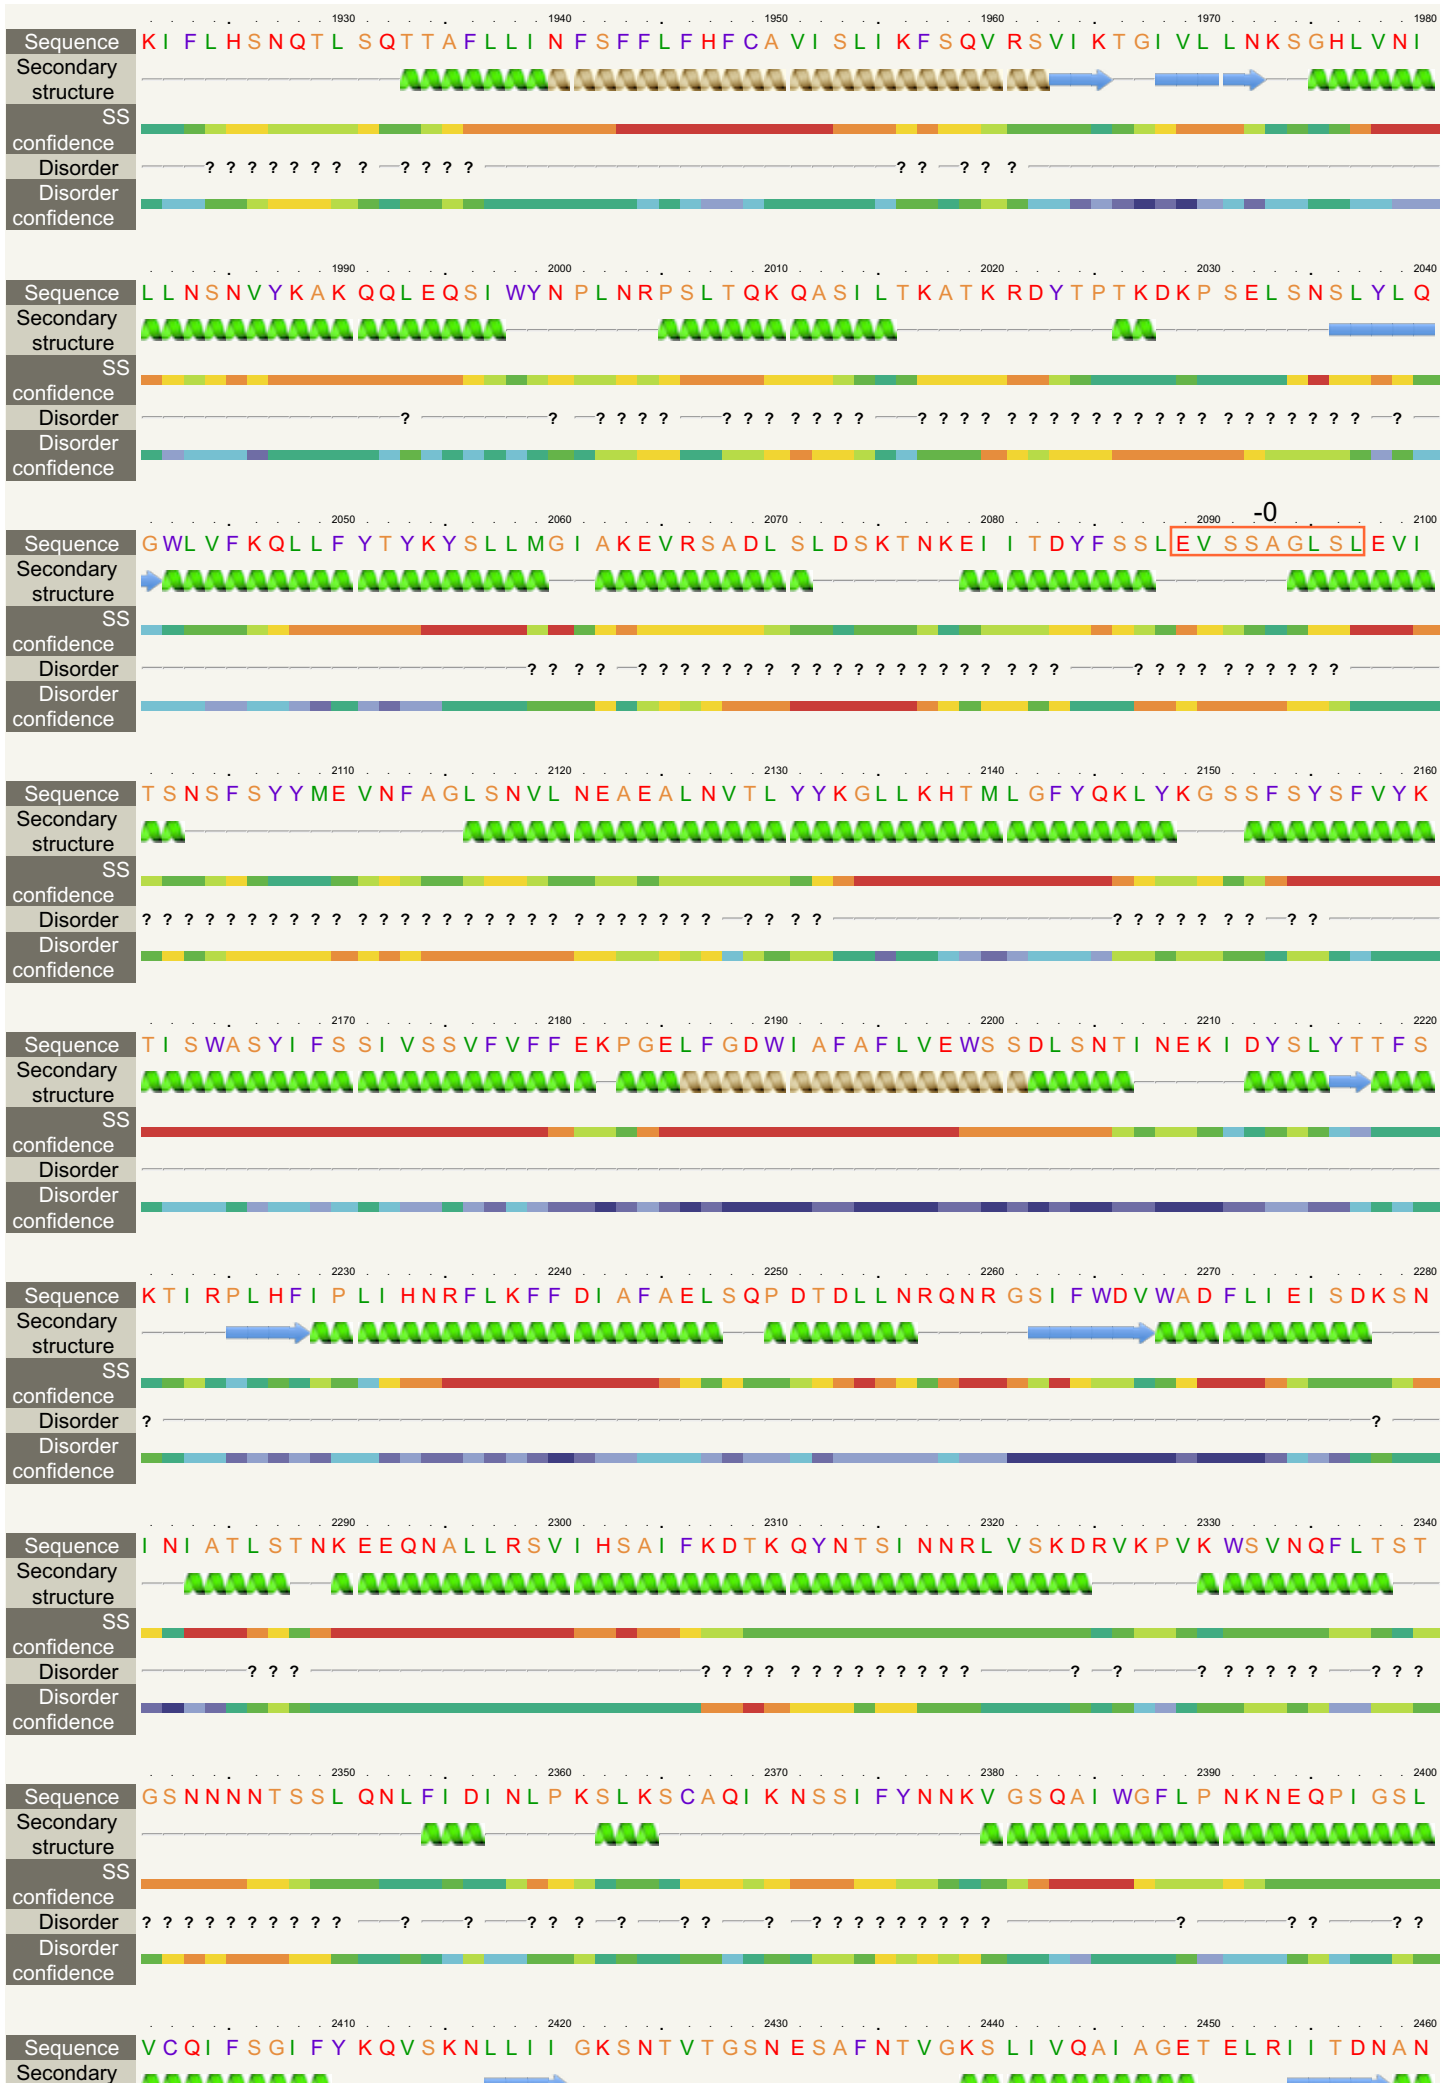

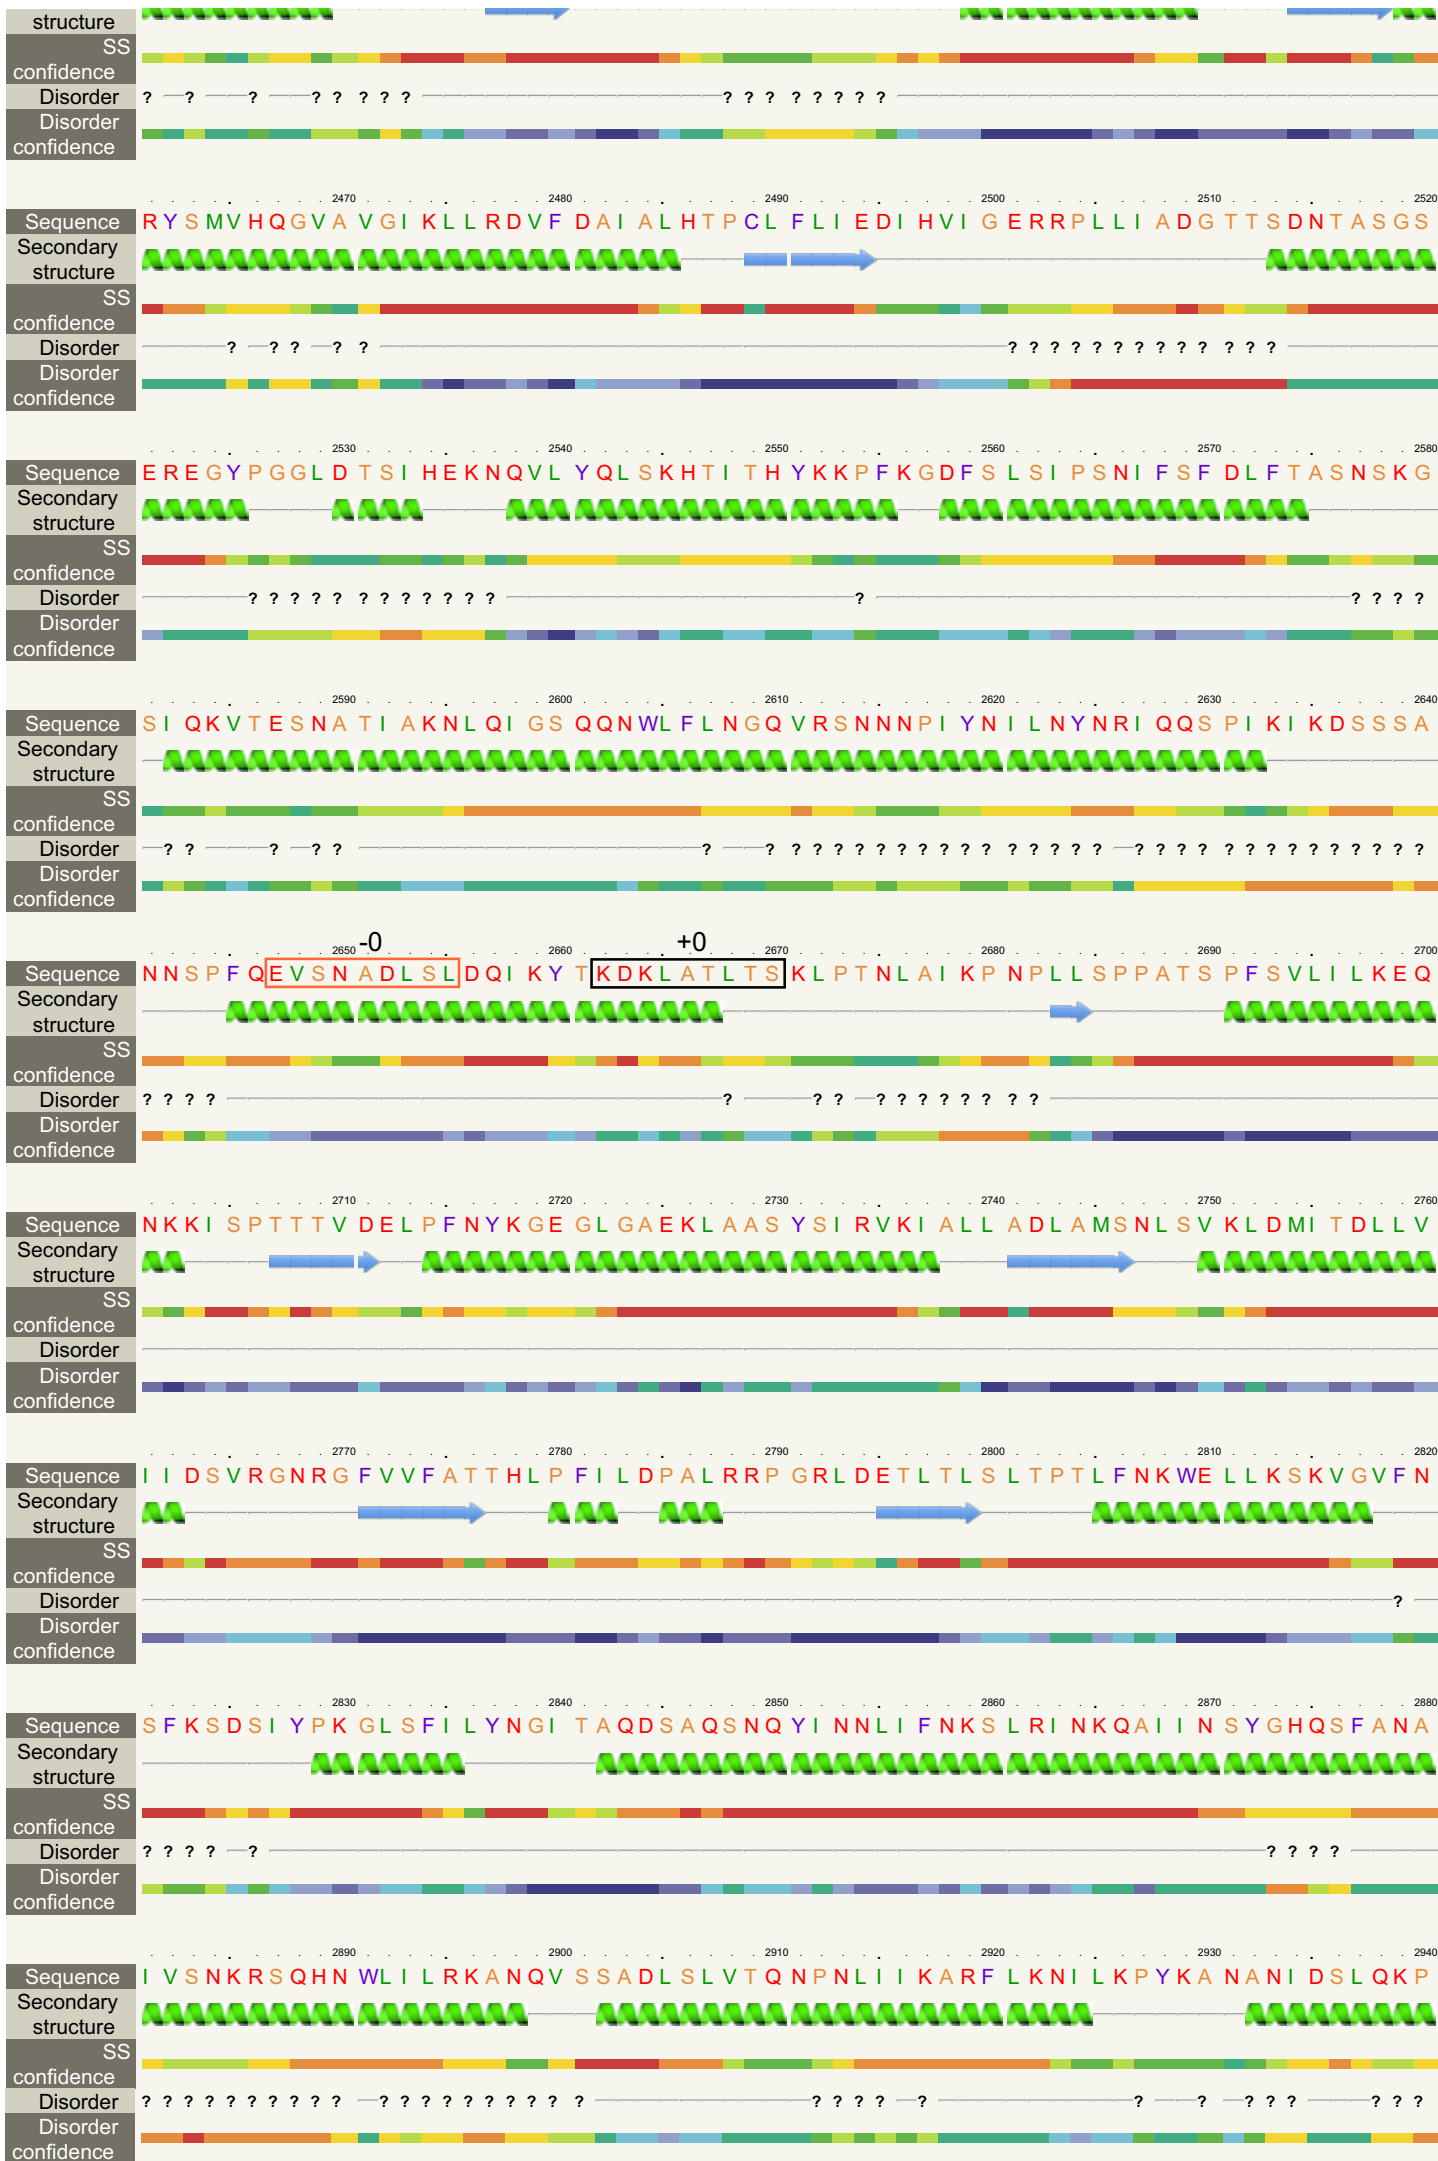

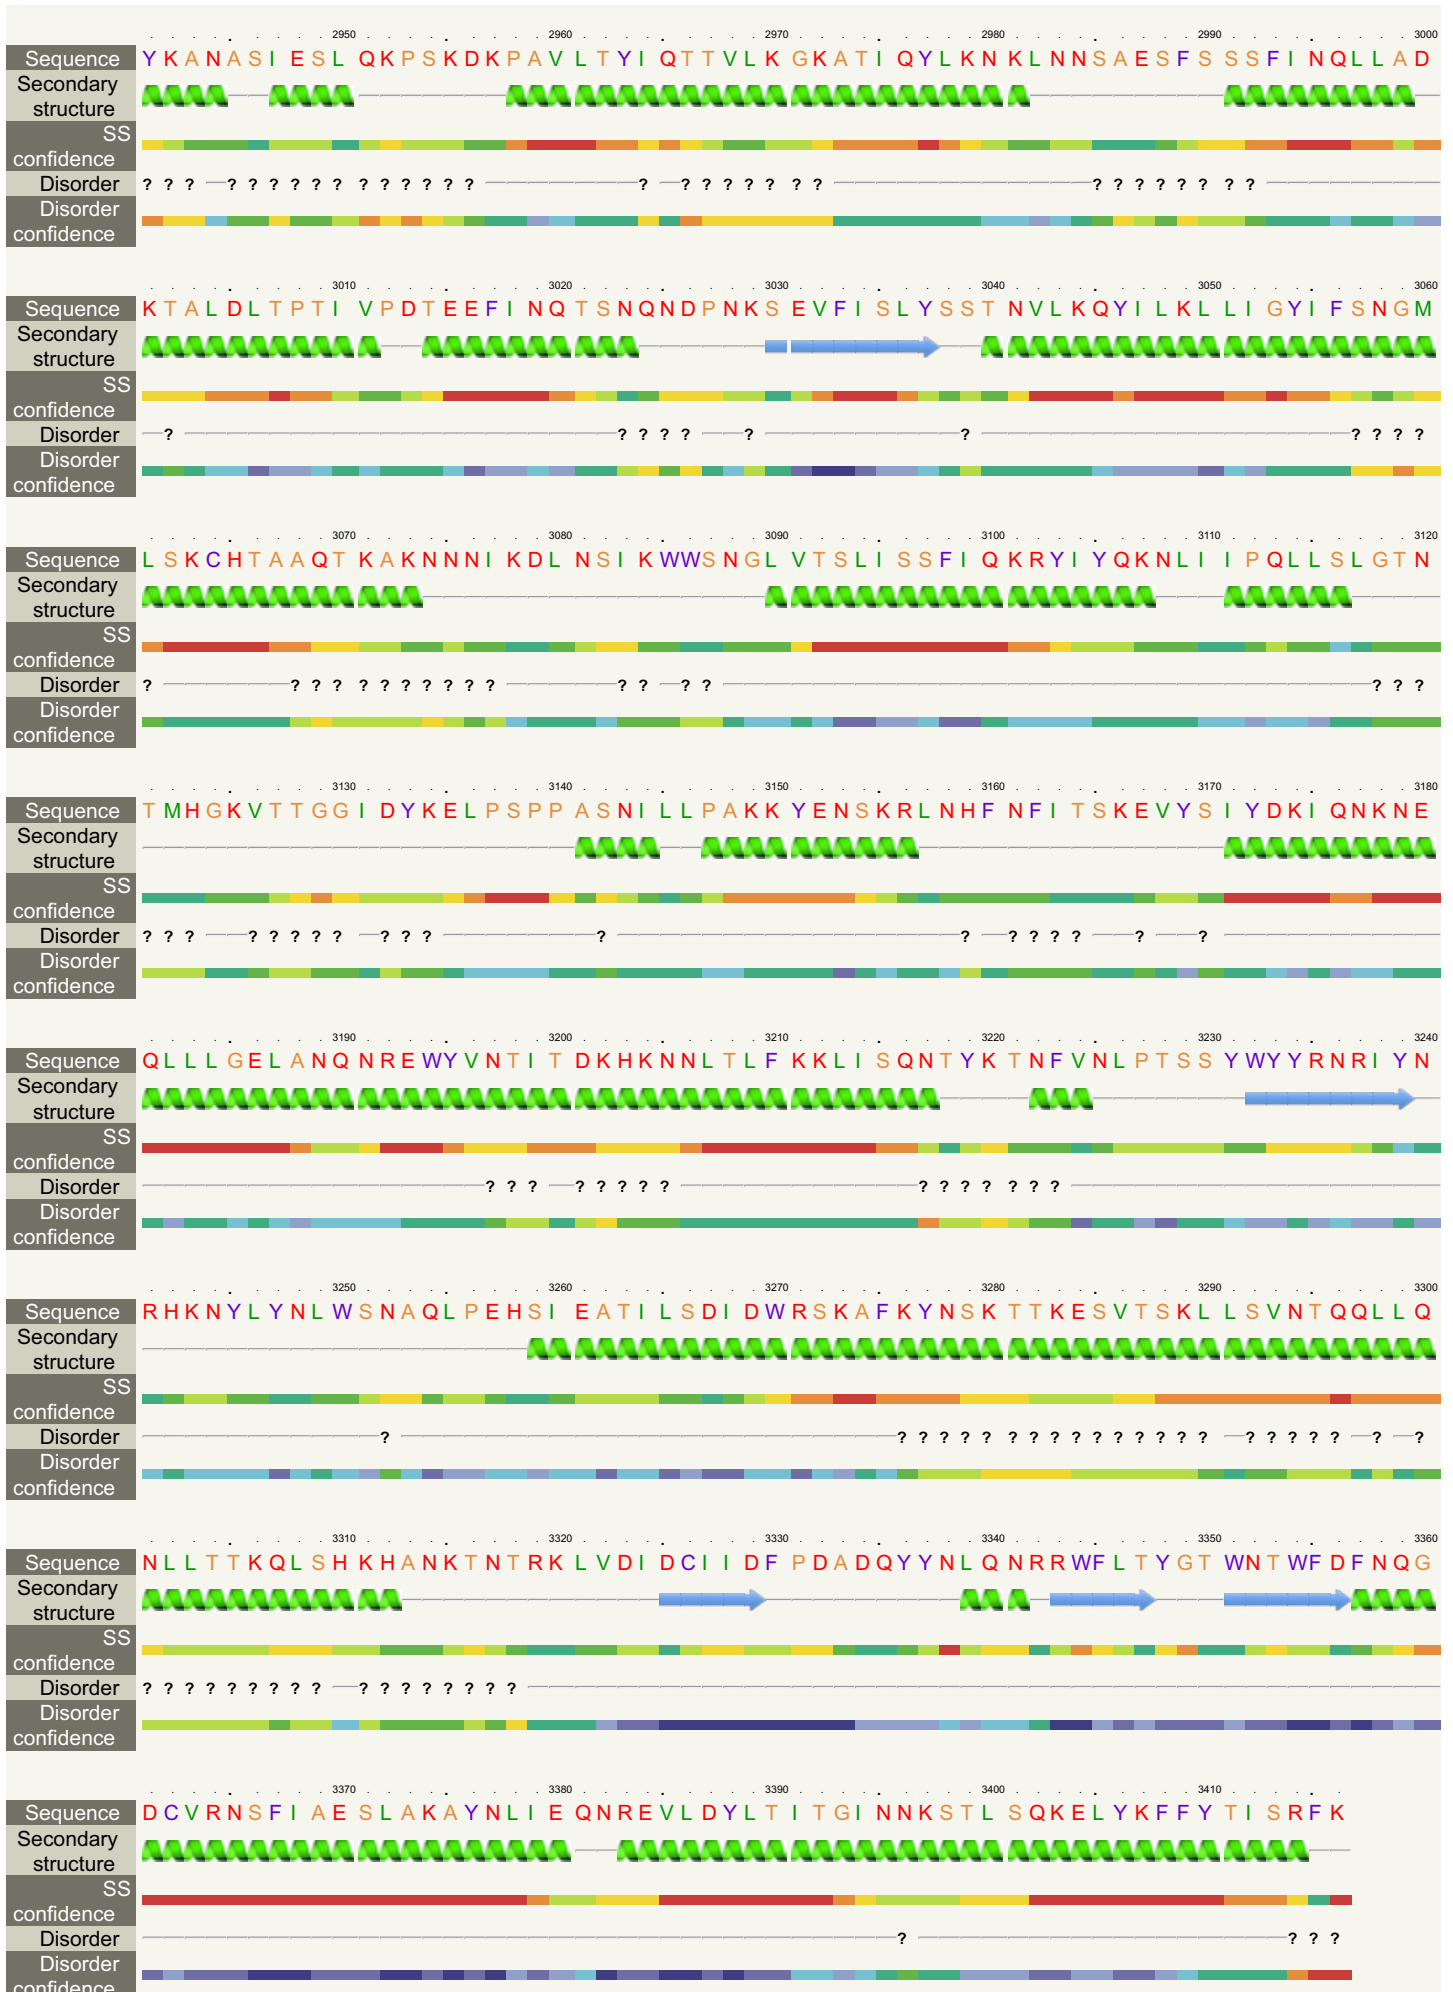

**Fig. S6** Occurrence of the “variant 8” repeat (see Fig. 4) in the FtsH protein of *Leontynka pallida* mapped on its predicted structure. Protein model has been computed *in silico* using Phyre2 program. The „variant 8” repeat in RF +0 and -0 as well as a larger repeat containing the „variant 8” repeat in RF +0 are highlighted in coloured boxes.

10 20 30 40 50 60 70 80 90 100  
realigned-end .....  
mtDNA\_final AACATGTTCTTTGGCTCGTCCGAGTCCGTCGGCTTCGCCCTCGCTCCGTCGGAGCCCCATGTTCTTCCGACTTTGTGACGTAGCCCAACATGTT

110 120 130 140 150 160 170 180 190 200  
realigned-end .....  
mtDNA\_final CTCTCAACATGTTCTTAAACATGTTCTCCTAACATGTTCCAGAGAACATGTTCTCTTGGCTCGTCCGAGTCGCTCGGCTTCGCCCTCGCTCCTCG

210 220 230 240 250 260 270 280 290 300  
realigned-end .....  
mtDNA\_final TCCGAGCCCCATGTTCTTGCACTTTGTGAGATGCTTTCCCAAGCCCCAACATGTTCTCTTAAACATGTTCTCTTAAACATGTTCTCTTGGCTCGTC

310 320 330 340 350 360 370 380 390 400  
realigned-end .....  
mtDNA\_final CGAGTCGCTCGGCTTCGCCCTCGCTCCTCGTCCGAGCCCCATGGAATGCTTACAGGCCAGGACTGCCCTTCGGGGCAGATACTACATGTTCTCTTG

410 420 430 440 450 460 470 480 490 500  
realigned-end .....  
mtDNA\_final TGGCTCGTCCGAGTCGCTCGGCTTCGCCCTCGCTCCTCGTACGAGCCAGGTCATGTCCTAACCCGTTCCCGGAACCGTTCCCGGAACCGTTCCCGGA

510 520 530 540 550 560 570 580 590 600  
realigned-end .....  
mtDNA\_final ACCGTTCCCGGAACCGTTCCCGGAACCGTTCCCGGAACCGTTCCCGGAACCGTTCCCGGAACCGTTCCCGGAACCGTTCCCGGAACCGTTCCCGGA

610 620 630 640 650 660 670 680 690 700  
realigned-end .....  
mtDNA\_final CGAACCGTTCCCGGAACCGTTCCCGGAACCGTTCCCGGAACCGTTCCCGGAACCGTTCCCGGAACCGTTCCCGGAACCGTTCCCGGAACCGTTCCCGGA

710 720 730 740 750 760 770 780 790 800  
realigned-end .....  
mtDNA\_final CCCC GCCGTC AACCGTTCCCGGAACCGTTCCCGGAACCGTTCCCGGAACCGTTCCCGGAACCGTTCCCGGAACCGTTCCCGGAACCGTTCCCGGA

810 820 830 840 850 860 870 880 890 900  
realigned-end .....  
mtDNA\_final TAGTTCACATGAGTCTGTAAGTATTATGATTCTGCTAAGTCTTCCCGAACATGTTCTCTTGTGGCTCGTCCGAGTCGCTCGGCTTCGCCCTCGCTC

910 920 930 940 950 960 970 980 990 1000  
realigned-end .....  
mtDNA\_final CTGTCCTTCGCCCTCATGTTCTTGTGGCTCGTCCGAGTCGCTCGGCTTCGCCCTCGCTCCTCGCTCCGCTCATGTTCTCTTAAACATGTTCTCTTGT

1010 1020 1030 1040 1050 1060 1070 1080 1090 1100  
realigned-end .....  
mtDNA\_final GGCTCGCCGAGTCGCTCGGCTTCGCCCTCGCTCCTCGCTCATGTTCTCTTAAACATGTTCTCTTGTGGCTCGTCCGAGTCGCTCGGCTTCGCC

1110 1120 1130 1140 1150 1160 1170 1180 1190 1200  
realigned-end .....  
mtDNA\_final TCGTCTCTGTCAGAGCCAGGTCATGTCCTTAAACCGTTCCCGGAACCGTTCCCGGAACCGTTCCCGGAACCGTTCCCGGAACCGTTCCCGGAAC

1210 1220 1230 1240 1250 1260 1270 1280 1290 1300  
realigned-end .....  
mtDNA\_final CGTTCGCCGGAACCGTTCCCGGAACCGTTCCCGGAACCGTTCCCGGAACCGTTCCCGGAACCGTTCCCGGAACCGTTCCCGGAACCGTTCCCGGA

1310 1320 1330 1340 1350 1360 1370 1380 1390 1400  
realigned-end .....  
mtDNA\_final CCCCCGAACCGTTCCCGGAACCGTTCCCGGAACCGTTCCCGGAACCGTTCCCGGAACCGTTCCCGGAACCGTTCCCGGAACCGTTCCCGGAACCG

1410 1420 1430 1440 1450 1460 1470 1480 1490 1500  
realigned-end .....  
mtDNA\_final TGCTAAGTATTATGATATTCCGATGCTTTCCCAAGCCCCAACATGTTCTCTTGTGGCTCGTCCGAGTCGCTCGGCTTCGCCCTCGCTCCTCGTCTCG

1510 1520 1530 1540 1550 1560 1570 1580 1590 1600  
realigned-end .....  
mtDNA\_final CCTCATGTTCTCTTAAACATGTTCTCTTGTGGCTCGTCCGAGTCGCTCGGCTTCGCCCTCGCTCCTCGTCCGAGCCCCATGTTCTTGCACTTTGTGACG

1610 1620 1630 1640 1650 1660 1670 1680 1690 1700  
realigned-end .....  
mtDNA\_final TAGCCCAACATGTTCTATCAACATGTTCTCTTGTGGCTCGTCCGAGTCGCTCGGCTTCGCCCTCGCTCCTCGTCCGCTCATGTTCTCTTGTGGCTCG

1710 1720 1730 1740 1750 1760 1770 1780 1790 1800  
realigned-end .....  
mtDNA\_final TCCGAGTCGCTCGGCTTCGCCCTCGCTCCTCGTCCGCTCATGTTCTCTTAAACATGTTCTCTTGTGGCTCGTCCGAGTCGCTCGGCTTCGCCCTCGCTC

1810 1820 1830 1840 1850 1860 1870 1880 1890 1900  
realigned-end .....  
mtDNA\_final CTGTCGCCGAGCCCCATGTTCTTGCACATGTTCTCTTGTGGCTCGTCCGAGTCGCTCGGCTTCGCCCTCGCTCCTCGTCCGCTCATGTTCTCTTAA

1910 1920 1930 1940 1950 1960 1970 1980 1990 2000  
realigned-end .....  
mtDNA\_final CATGTTCTCTTGTGGCTCGTCCGAGTCGCTCGGCTTCGCCCTCGCTCCTCGTCCGCTCATGTTCTCTTAAACATGTTCTCTTGTGGCTCGTCCGAGTC

2010 2020 2030 2040 2050 2060 2070 2080 2090 2100  
realigned-end .....  
mtDNA\_final .....

realigned-end GCTCGGCTTCGCCTCGCTCCTCGTCTTCCGCTCATGTTCTCTTAAACATGTTCTTGTGGCTCGTCGAGTCGCTCGGCTTCGCCTCGCTCCTCGTCCC  
mtDNA\_final GCTCGGCTTCGCCTCGCTCCTCGTCTTCCGCTCATGTTCTCTTAAACATGTTCTTGTGGCTCGTCGAGTCGCTCGGCTTCGCCTCGCTCCTCGTCCC

2110 2120 2130 2140 2150 2160 2170 2180 2190 2200

realigned-end GAGCCCCATGGCAATGCCACAGGCCAGGACTGCCCTTCCGGGGCAGATACACATGTTCTCTTGGCTCGTCCGAGTCGCTCGGCTTCGCCTCGCTCCTCGTCCC  
mtDNA\_final GAGCCCCATGGCAATGCCACAGGCCAGGACTGCCCTTCCGGGGCAGATACACATGTTCTCTTGGCTCGTCCGAGTCGCTCGGCTTCGCCTCGCTCCTCGTCCC

2210 2220 2230 2240 2250 2260 2270 2280 2290 2300

realigned-end CCTCTACGAGCAGGTCAATGCCACAGGCCAGGACTGCCCTTCCGGGGCAGATACACATGTTCTCTTGGCTCGTCCGAGTCGCTCGGCTTCGCCTCGCTCCTCGTCCC  
mtDNA\_final CCTCTACGAGCAGGTCAATGCCACAGGCCAGGACTGCCCTTCCGGGGCAGATACACATGTTCTCTTGGCTCGTCCGAGTCGCTCGGCTTCGCCTCGCTCCTCGTCCC

2310 2320 2330 2340 2350 2360 2370 2380 2390 2400

realigned-end CCGTCCC CGAACCGTTCCC CGAACCGTTCCC C GGGGGCCATGAGTCGAGATTGGTTGGCAAGACATGATTCTGCACCCCGCTAGTTCGCCACATGA  
mtDNA\_final CCGTCCCCGAACCGTTCCCCGAACCGTTCCCCAGGGGGCCATGAGTCGAGATTGGTTGGCAAGACATGATTCTGCACCCCGCTAGTTCGCCACATGA

2410 2420 2430 2440 2450 2460 2470 2480 2490 2500

realigned-end TTCTGCACCCCGCTAGTTCGCCACATGATTCTGCAAGTATATCCAAAGCGTGATCTGGGTGTTCTCTTAAACATGTTCTCTTGGCTCGTCCGAGTCGCT  
mtDNA\_final TTCTGCACCCCGCTAGTTCGCCACATGATTCTGCAAGTATATCCAAAGCGTGATCTGGGTGTTCTCTTAAACATGTTCTCTTGGCTCGTCCGAGTCGCT

2510 2520 2530 2540 2550 2560 2570 2580 2590 2600

realigned-end CGGCTTCGCCTCGCTCCTCGTCTTCCGCTAGCTCCTCGTACCTGATCCAAAGCGTGATCTGGGTGTTCTCTTAAACATGTTCTCTTGGCTCGTCCGAGTCGCT  
mtDNA\_final CGGCTTCGCCTCGCTCCTCGTCTTCCGCTAGCTCCTCGTACCTGATCCAAAGCGTGATCTGGGTGTTCTCTTAAACATGTTCTCTTGGCTCGTCCGAGTCGCT

2610 2620 2630 2640 2650 2660 2670 2680 2690 2700

realigned-end GCCCCCCGTTACCCGTTCCCGTAACCCGTTCCCGTAACCCGTTCCCGGAACCGTTCCCGGAACCGTTCCCGGAACCGTTCCCGGAACCGTTCCCG  
mtDNA\_final GCCCCCCGTTACCCGTTCCCGTAACCCGTTCCCGTAACCCGTTCCCGGAACCGTTCCCGGAACCGTTCCCGGAACCGTTCCCGGAACCGTTCCCG

2710 2720 2730 2740 2750 2760 2770 2780 2790 2800

realigned-end TGAACCGTTCCCGGAACCGTTCCCGGAACCGTTCCCGGAACCGTTCCCGGAACCGTTCCCGGAACCGTTCCCGGAACCGTTCCCGGAACCGTTCCCG  
mtDNA\_final TGAACCGTTCCCGGAACCGTTCCCGGAACCGTTCCCGGAACCGTTCCCGGAACCGTTCCCGGAACCGTTCCCGGAACCGTTCCCGGAACCGTTCCCG

2810 2820 2830 2840 2850 2860 2870 2880 2890 2900

realigned-end CCGGAACCGTTCCCGTAACCCGTTCCCGTAACCCGTTCCCGGAACCGTTCCCGGAACCGTTCCCGGAACCGTTCCCGGAACCGTTCCCGGAACCGTTCCCG  
mtDNA\_final CCGGAACCGTTCCCGTAACCCGTTCCCGTAACCCGTTCCCGGAACCGTTCCCGGAACCGTTCCCGGAACCGTTCCCGGAACCGTTCCCGGAACCGTTCCCG

2910 2920 2930 2940 2950 2960 2970 2980 2990 3000

realigned-end CCGTAAGAGGGCAACCGTAAGAGGGCAACCGTAAGAGGGCAACCGTAAGAGGGCAACCGTAAGAGGGCAACCGTAAGAGGGCAACCGTAAGAGGGCAACCG  
mtDNA\_final CCGTAAGAGGGCAACCGTAAGAGGGCAACCGTAAGAGGGCAACCGTAAGAGGGCAACCGTAAGAGGGCAACCGTAAGAGGGCAACCGTAAGAGGGCAACCG

3010 3020 3030 3040 3050 3060 3070 3080 3090 3100

realigned-end GTAAGAGGGCAACCGTAAGAGGGCAACCGTAAGAGGGCAACCGTAAGAGGGCAACCGTAAGAGGGCAACCGTAAGAGGGCAACCGTAAGAGGGCAACCG  
mtDNA\_final NNNNNNNNCAACCGTAAG GGGCAACCGTAAGAGGGCAACCGTAAGAGGGCAACCGTAAGAGGGCAACCGTAAGAGGGCAACCGTAAGAGGGCAACCG

3110 3120 3130 3140 3150 3160 3170 3180 3190 3200

realigned-end CGCTCGCTCCCGTCCGCTCATGTTCTCTTAAACATGTTCTCTTGGCTCGTCCGAGTCGCTCGGCTTCGCCTCGCAAGAGGGCAACGGTAAGAG  
mtDNA\_final CGCTCGCTCCCGTCCGCTCATGTTCTCTTAAACATGTTCTCTTGGCTCGTCCGAGTCGCTCGGCTTCGCCTCGCAAGAGGGCAACGGTAAGAG

3210 3220 3230 3240 3250 3260 3270 3280 3290 3300

realigned-end GGCAACGGTAAGAGGGCAACCGTAAGAGGGCAACCGTAAGAGGGCAACCGTAAGAGGGCAACCGTAAGAGGGCAACCGTAAGAGGGCAACCGTAAGAGGGCAACCG  
mtDNA\_final GGCAACGGTAAGAGGGCAACCGTAAGAGGGCAACCGTAAGAGGGCAACCGTAAGAGGGCAACCGTAAGAGGGCAACCGTAAGAGGGCAACCGTAAGAGGGCAACCG

3310 3320 3330 3340 3350 3360 3370 3380 3390 3400

realigned-end ATGTTCTCTTGGCTCGTCCGAGTCGCTCGGCTTCGCCTCGTCCGCTCTTCCGCTAGCTCCTCGTACCTGATCCAAAGCGTGATCTTCCAAAGCGT  
mtDNA\_final ATGTTCTCTTGGCTCGTCCGAGTCGCTCGGCTTCGCCTCGTCCGCTCTTCCGCTAGCTCCTCGTACCTGATCCAAAGCGTGATCTTCCAAAGCGT

3410 3420 3430 3440 3450 3460 3470 3480 3490 3500

realigned-end ATCTGGCCATCCGGAGCTTGGGCTTGTCCCGCCGTTACCCGTTCCGTAACCCGTTCCGTAACCCGTTCCGTAACCCGTTCCGTAACCCGTTCCGTAACCCGTTCCG  
mtDNA\_final ATCTGGCCATCCGGAGCTTGGGCTTGTCCCGCCGTTACCCGTTCCGTAACCCGTTCCGTAACCCGTTCCGTAACCCGTTCCGTAACCCGTTCCGTAACCCGTTCCG

3510 3520 3530 3540 3550 3560 3570 3580 3590 3600

realigned-end CCCCGAACCGTTCCCGGAACCGTTCCCGTAACCCGTTCCCGGAACCGTTCCCGGAACCGTTCCCGGAACCGTTCCCGGAACCGTTCCCGGAACCGTTCCCG  
mtDNA\_final CCCCGAACCGTTCCCGGAACCGTTCCCGTAACCCGTTCCCGGAACCGTTCCCGGAACCGTTCCCGGAACCGTTCCCGGAACCGTTCCCGGAACCGTTCCCG

3610 3620 3630 3640 3650 3660 3670 3680 3690 3700

realigned-end TTCGCCGAACCGTTCCCGGAACCGTTCCCGGAACCGTTCCCGGAACCGTTCCCGGAACCGTTCCCGGAACCGTTCCCGGAACCGTTCCCGGAACCGTTCCCG  
mtDNA\_final TTCGCCGAACCGTTCCCGGAACCGTTCCCGGAACCGTTCCCGGAACCGTTCCCGGAACCGTTCCCGGAACCGTTCCCGGAACCGTTCCCGGAACCGTTCCCG

3710 3720 3730 3740 3750 3760 3770 3780 3790 3800

realigned-end CCGTTCGCCGAACCGTTCCCGGAACCGTTCCCGGAACCGTTCCCGGAACCGTTCCCGGAACCGTTCCCGGAACCGTTCCCGGAACCGTTCCCGGAACCGTTCCCG  
mtDNA\_final CCGTTCGCCGAACCGTTCCCGGAACCGTTCCCGGAACCGTTCCCGGAACCGTTCCCGGAACCGTTCCCGGAACCGTTCCCGGAACCGTTCCCGGAACCGTTCCCG

3810 3820 3830 3840 3850 3860 3870 3880 3890 3900

realigned-end CAAATCCTAGTCCCATCTGATTCGTAAGTCTTCTGATTCGTAAGTCTTCCAGATTCGTAAGTCTTCTGATTCGCAACCCCGTAGTTCACCA  
mtDNA\_final CAAATCCTAGTCCCATCTGATTCGTAAGTCTTCTGATTCGTAAGTCTTCCAGATTCGTAAGTCTTCTGATTCGCAACCCCGTAGTTCACCA

3910 3920 3930 3940 3950 3960 3970 3980 3990 4000

realigned-end CATGATTCCTCGTAAGTATTTATGATTCAGCTAAGTCTTCCGCCAATGTTCTCTTGGCTCGTCCGAGTCGCTCGGCTTCGCCCTCGCTCCGCTTC  
mtDNA\_final CATGATTCCTCGTAAGTATTTATGATTCAGCTAAGTCTTCCGCCAATGTTCTCTTGGCTCGTCCGAGTCGCTCGGCTTCGCCCTCGCTCCGCTTC

4010 4020 4030 4040 4050 4060 4070 4080 4090 4100

realigned-end GCCTAGTCTCTGTAACCTGATCCAAAGCGTGATCTGGCCATCCGGAGTTGGCTTGTGCCACCTGATCCAAAGCGTGATCTGGCCATCCGGAG  
mtDNA\_final GCCTAGTCTCTGTAACCTGATCCAAAGCGTGATCTGGCCATCCGGAGTTGGCTTGTGCCACCTGATCCAAAGCGTGATCTGGCCATCCGGAG

```

      4110      4120      4130      4140      4150      4160      4170      4180      4190      4200
realigned-end .....|.....|.....|.....|.....|.....|.....|.....|.....|.....|
mtDNA_final   CTTGGGTTGTGCCCCCGTTACCCGTTCCCGTAACCCGTTCCCGTAACCCGTTCCCGGAACCGTTCCCGGAACCGTTCCCGGAACCGTTCCCGCG
      4210      4220      4230      4240      4250      4260      4270      4280      4290      4300
realigned-end .....|.....|.....|.....|.....|.....|.....|.....|.....|.....|
mtDNA_final   AACCGTTCCCGTAACCGTTCCCGGAACCGTTCCCGGAACCGTTCCCGGAACCGTTCCCGTAACCGTTCCCGGAACCGTTCCCGTAACCGTTCCCG
      4310      4320      4330      4340      4350      4360      4370      4380      4390      4400
realigned-end .....|.....|.....|.....|.....|.....|.....|.....|.....|.....|
mtDNA_final   CCAACCGTTCCCGGAACCGTTCCCGGAACCGTTCCCGGAACCGTTCCCGGAACCGTTCCCGGAACCGTTCCCGGAACCGTTCCCGGAACCGTTCCCGGA
      4410      4420      4430      4440      4450      4460      4470      4480      4490      4500
realigned-end .....|.....|.....|.....|.....|.....|.....|.....|.....|.....|
mtDNA_final   GGGCCATGAGTCCGAGATTGGTTGGCAAGACATGATTCTGCACCCCGTAGTTCCACATGATTCGACCCCGTAGTTCCACATGATTCGACCCCGTAGTTCCAC
      4510      4520      4530      4540      4550      4560      4570      4580      4590      4600
realigned-end .....|.....|.....|.....|.....|.....|.....|.....|.....|.....|
mtDNA_final   GCTAGTCCCA--TGATTCGCAAGTATTGTTACGCTAACTGTTCTGAGCTGCCGGTAGCTCCACGTAATTCCGCTAAGTATTAATGATTATGCAC
      4610      4620      4630      4640      4650      4660      4670      4680      4690      4700
realigned-end .....|.....|.....|.....|.....|.....|.....|.....|.....|.....|
mtDNA_final   CCGCTAGTCCCAATGAGTCTGCTAAGTATTTATGAGCTGCTAAGTCTTGCCCAACATGTTCTCTTGGCTCGCCGAGTCGCTCGGCTTCGCTTCGCT
      4710      4720      4730      4740      4750      4760      4770      4780      4790      4800
realigned-end .....|.....|.....|.....|.....|.....|.....|.....|.....|.....|
mtDNA_final   CGCTCCGCTTCGCTAGCTCCCTGATACCAACATGTTCTCTTGGCTCGTCCGAGTCGCTCGGCTTCGCTTCGCTCCGTTCCGAGCCCCATG
      4810      4820      4830      4840      4850      4860      4870      4880      4890      4900
realigned-end .....|.....|.....|.....|.....|.....|.....|.....|.....|.....|
mtDNA_final   TTCCTGCACTTTGTGACGTAGCCCAACATGTTCTATCAACATGTTCTCTTGGCTCGTCCGAGTCGCTCGGCTTCGCTTCGCTCCGCTTCGCTTCGCT
      4910      4920      4930      4940      4950      4960      4970      4980      4990      5000
realigned-end .....|.....|.....|.....|.....|.....|.....|.....|.....|.....|
mtDNA_final   CATGTTCTCTTGGCTCGTCCGAGTCGCTCGGCTTCGCTTCGCTTCGCTTCGCTTCGCTTCGCTTCGCTTCGCTTCGCTTCGCTTCGCTTCGCTTCGCTTC
      5010      5020      5030      5040      5050      5060      5070      5080      5090      5100
realigned-end .....|.....|.....|.....|.....|.....|.....|.....|.....|.....|
mtDNA_final   GCTCGGCTTCGCTTCGCTTCGCTTCGCTTCGCTTCGCTTCGCTTCGCTTCGCTTCGCTTCGCTTCGCTTCGCTTCGCTTCGCTTCGCTTCGCTTCGCTTC
      5110      5120      5130      5140      5150      5160      5170      5180      5190      5200
realigned-end .....|.....|.....|.....|.....|.....|.....|.....|.....|.....|
mtDNA_final   GTCCGAGTCGCTCGGCTTCGCTTCGCTTCGCTTCGCTTCGCTTCGCTTCGCTTCGCTTCGCTTCGCTTCGCTTCGCTTCGCTTCGCTTCGCTTCGCTTC
      5210      5220      5230      5240      5250      5260      5270      5280      5290      5300
realigned-end .....|.....|.....|.....|.....|.....|.....|.....|.....|.....|
mtDNA_final   CCACCTGATCCAAGCGCTGATCTGGGCCATCCGGGAGCTTGGCTTGTGCCCCCGTTACCCGTTCCCGTAACCCGTTCCCGTAACCCGTTCCCGCGAA
      5310      5320      5330      5340      5350      5360      5370      5380      5390      5400
realigned-end .....|.....|.....|.....|.....|.....|.....|.....|.....|.....|
mtDNA_final   CCGTCCCGGAACCGTTCCCGGAACCGTTCCCGGAACCGTTCCCGTAACCCGTTCCCGTAACCCGTTCCCGTAACCCGTTCCCGTAACCCGTTCCCGGA
      5410      5420      5430      5440      5450      5460      5470      5480      5490      5500
realigned-end .....|.....|.....|.....|.....|.....|.....|.....|.....|.....|
mtDNA_final   ACCGTTCCTCGAACCGTTCCCGGAACCGTTCCCGGAACCGTTCCCGTAACCCGTTCCCGTAACCCGTTCCCGTAACCCGTTCCCGTAACCCGTTCCCG
      5510      5520      5530      5540      5550      5560      5570      5580      5590      5600
realigned-end .....|.....|.....|.....|.....|.....|.....|.....|.....|.....|
mtDNA_final   CTCGGCTTCGCTTCGCTTCGCTTCGCTTCGCTTCGCTTCGCTTCGCTTCGCTTCGCTTCGCTTCGCTTCGCTTCGCTTCGCTTCGCTTCGCTTCGCTTC
      5610      5620      5630      5640      5650      5660      5670      5680      5690      5700
realigned-end .....|.....|.....|.....|.....|.....|.....|.....|.....|.....|
mtDNA_final   ACGGTAAGAGGGCAACGGTAAGAGGGCAAACGGTAAGAGGGCAACGGTAAGAGGGCAACGGTAAGAGGGCAACGGTAAGAGGGCAACGGTAAGAGGGCAAC
      5710      5720      5730      5740      5750      5760      5770      5780      5790      5800
realigned-end .....|.....|.....|.....|.....|.....|.....|.....|.....|.....|
mtDNA_final   CAGAGACAACATGTTCTCTTGTGGCTCGTCCGAGTCGCTCGGCTTCGCTTCGCTTCGCTTCGCTTCGCTTCGCTTCGCTTCGCTTCGCTTCGCTTC

```

**Fig. S7** Alignment of the highly similar terminal regions of the originally assembled linear mitogenome contig. The sequence similarity of the termini is 97.7% (along the alignment containing 5,771 nucleotide positions). The sequence marked here as “mtDNA\_final” represents the variant of the terminus that was retained in the final putatively circular-mapping full mitogenome sequence.

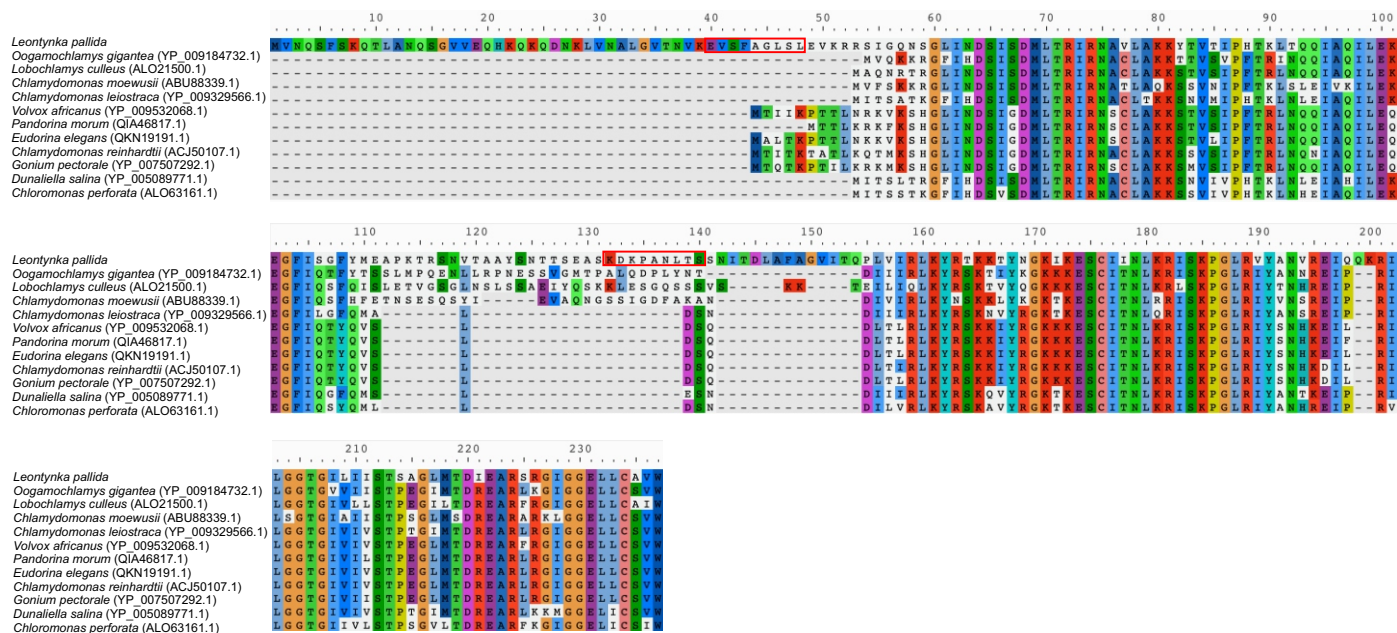

**Fig. S8** Occurrence of the “variant 8” repeat (translated in reading frame +0 as KDKPANLTS and -0 as KEVSFAGLSL; both boxed in red) in variable region of protein sequence of the ribosomal protein Rps8 from *Leontynka pallida* (full protein alignment together with representatives of other chlamydomonadalean algae).
